# Supplementary material
Source: PubMed Central journal article supplement (PMC6146819)
Supplement: zjv019183910s1.pdf [file zjv019183910s1.pdf]

## Supplemental materials

**Figure S1.** H5 low pathogenic introductions in the United States and Canada detected by using the phylogenetic tree analyses of the H5 gene. The introductions were detected in poultry on 5 commercial poultry farms (CPFs), 2 backyard poultry operation (BYP), 2 game bird poultry farm (GBP), and 9 live bird markets (LBMs). H5 isolates and introductions detected from CPFs, BYP, GBP and LBMs are highlighted in red, green, cyan, and blue, respectively. Bootstrap phylogenetic trees with bootstrap values are shown for determination of H5 isolates.

**Figure S2.** Maximum clade credibility phylogenetic tree for phylogeographical analysis of H5 genes in the United States and Canada. Branches are colored according to the estimated ancestral state of the bird migration flyways from discrete trait reconstruction. Corresponding Bayes test results are listed in Table S2. Isolates in two sub-lineages are selected from maximum-likelihood phylogenetic tree of H5 gene and validated by a bootstrap maximum-likelihood phylogenetic tree.

**Figure S3.** The geographic, temporal, and taxa distribution of IAVs (n=166) collected and sequenced from domestic poultry and wild bird in the United States and Canada in this study. **A:** The number of sample collected in each state was indicated by the size of dots on the map (Alberta, Canada not shown). **B:** The distribution of host ecological groups. **C&D:** The temporal distribution of influenza A virus isolates from each year. C is filled according to host ecological groups. D is filled according to HA subtypes.

**Figure S4.** The temporal and taxa distribution of all influenza A viruses included in this study (including sequences both sequenced in this study and downloaded from public databases). **A:** The bar graph indicates the number of all IAVs in each year, filled according to functional groups. **B:** The distribution of function groups for all IAVs. **C:** The bar graph indicates the number of H5 samples in each year, filled according to functional groups. **D:** The distribution of function groups for all H5 IAVs.

# Figure S1

- 11 H5 low pathogenic avian influenza A isolates detected in commercial poultry farm (CPF) from 5 introductions
- 62 H5 low pathogenic avian influenza A isolates detected in live bird market (LBM) from 9 introductions
- 3 H5 low pathogenic avian influenza A isolates detected in backyard flock poultry (BYP) from 2 introduction
- 2 H5 low pathogenic avian influenza A isolates detected in game bird flock poultry (GBP) from 2 introduction

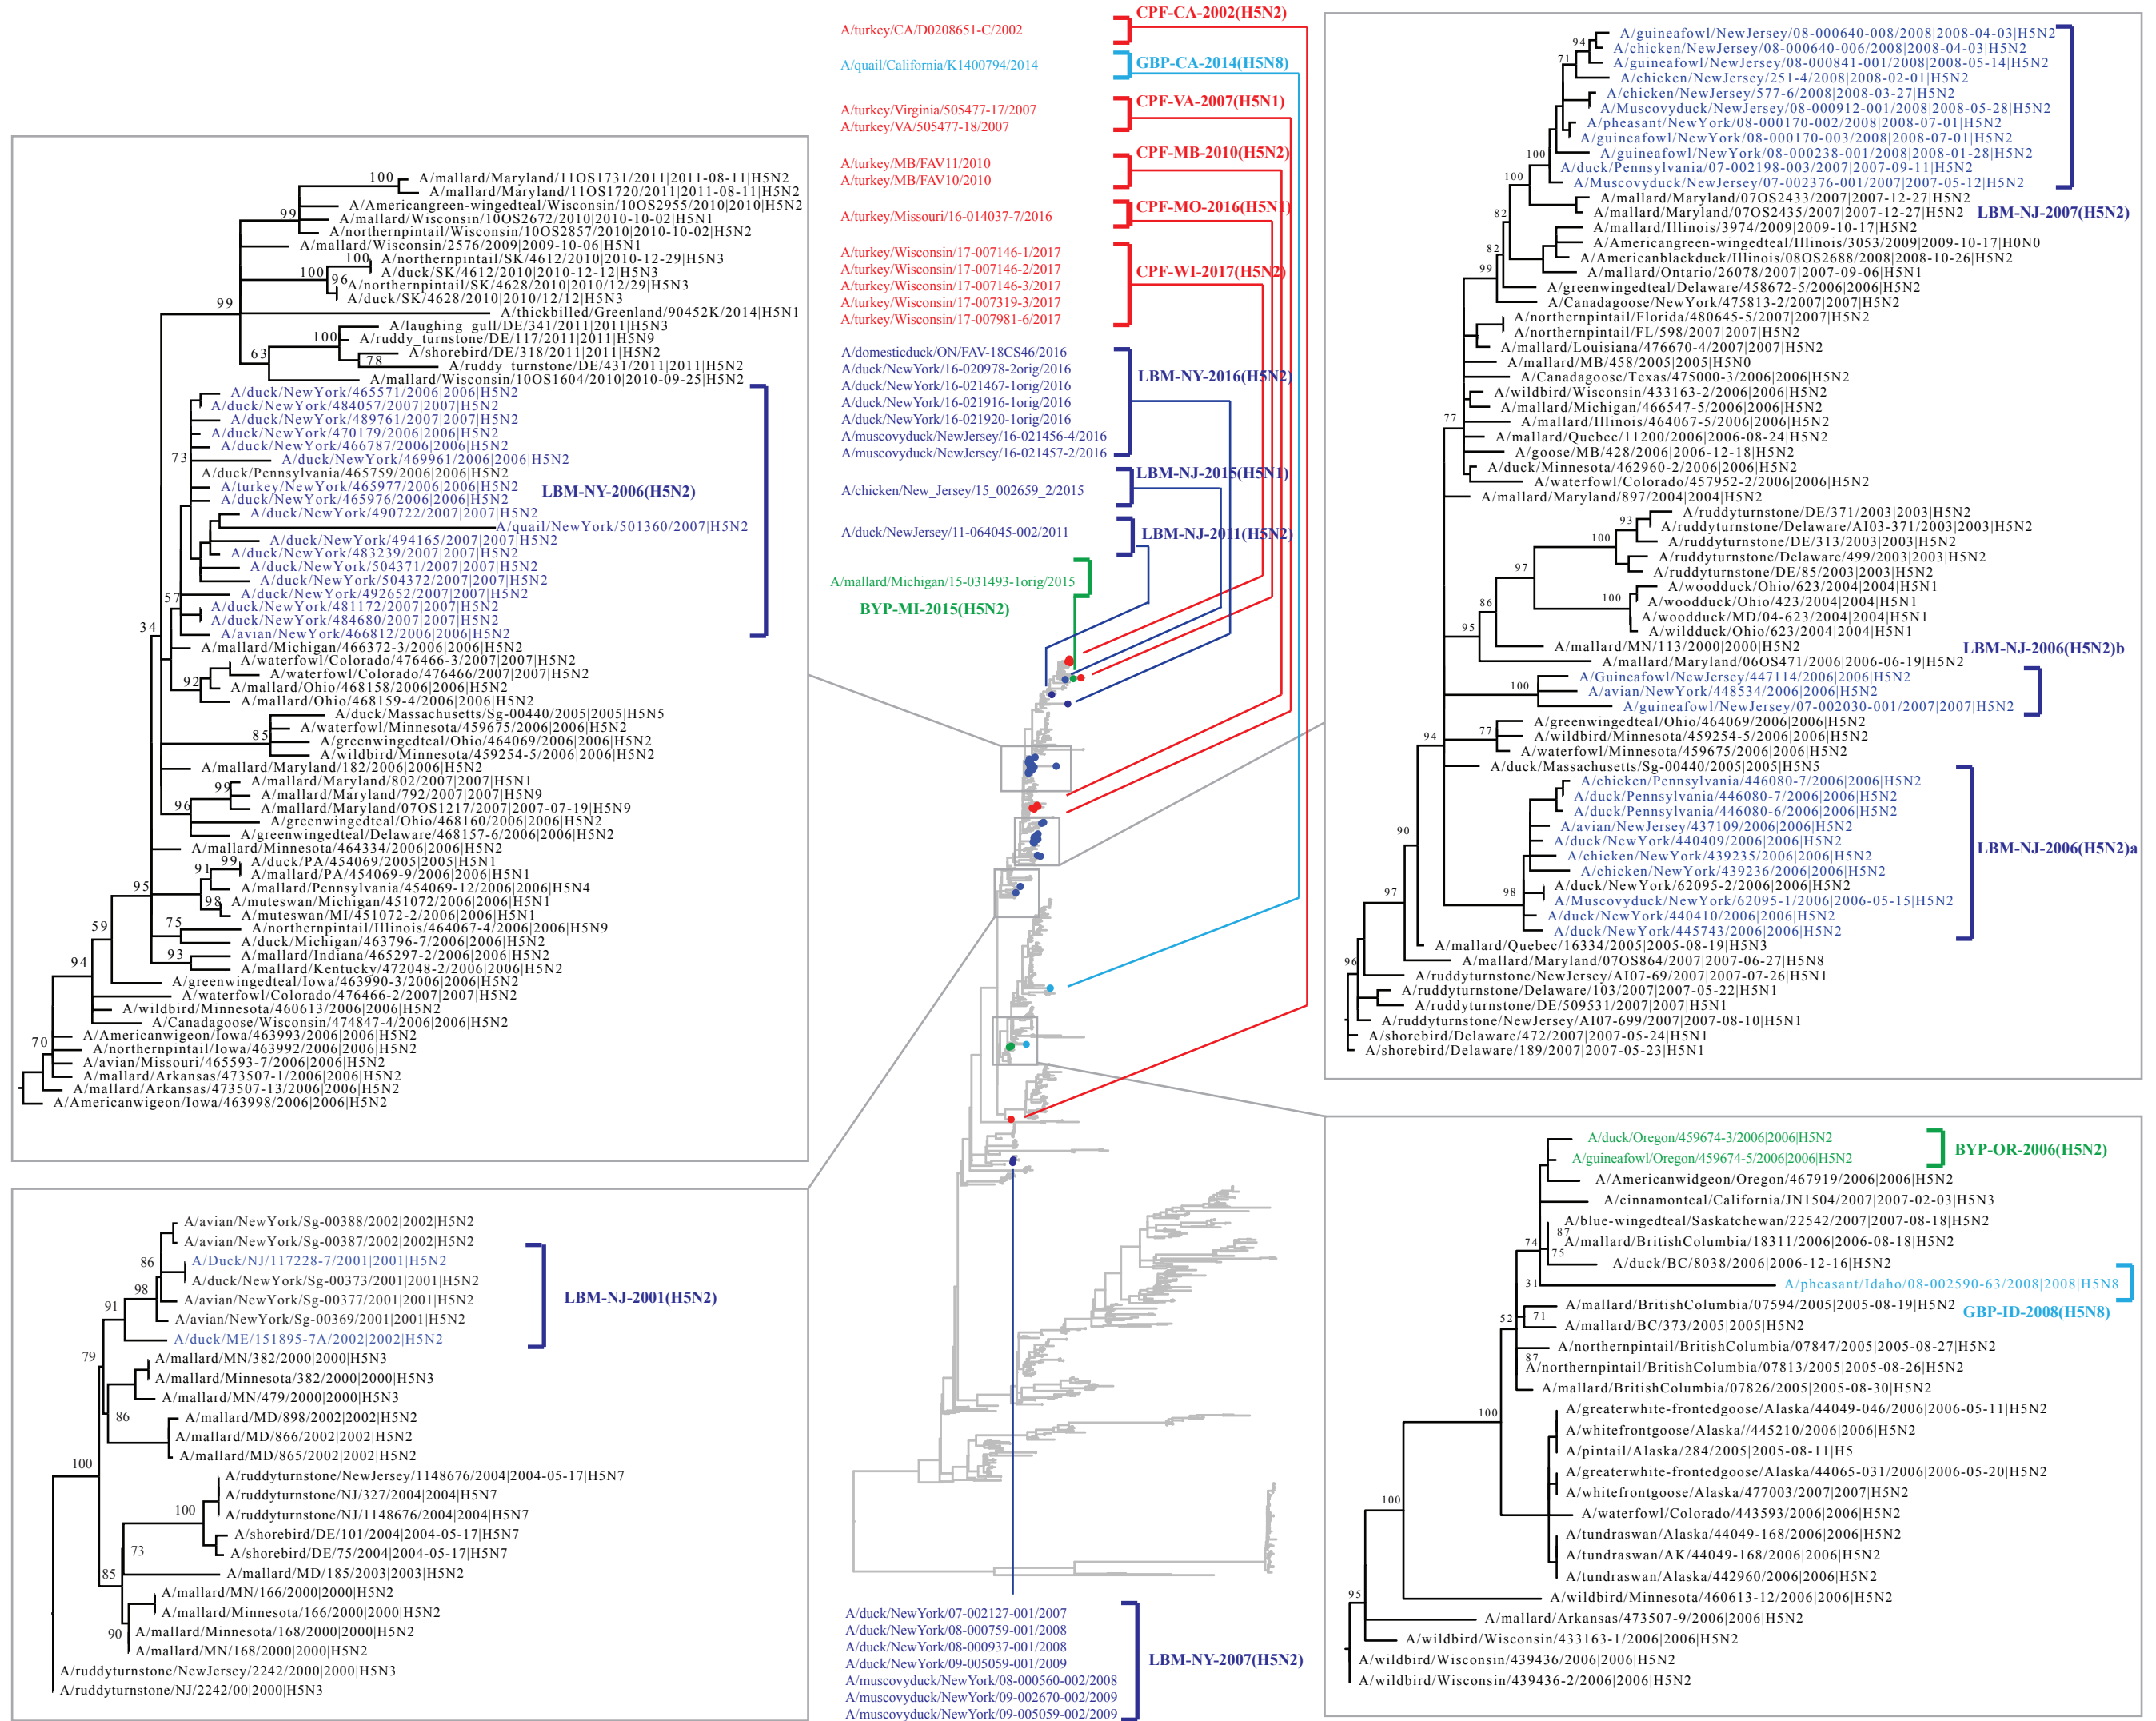

# Figure S2

- Atlantic bird migratory flyway
- Central bird migratory flyway
- Mississippi bird migratory flyway
- Pacific bird migratory flyway

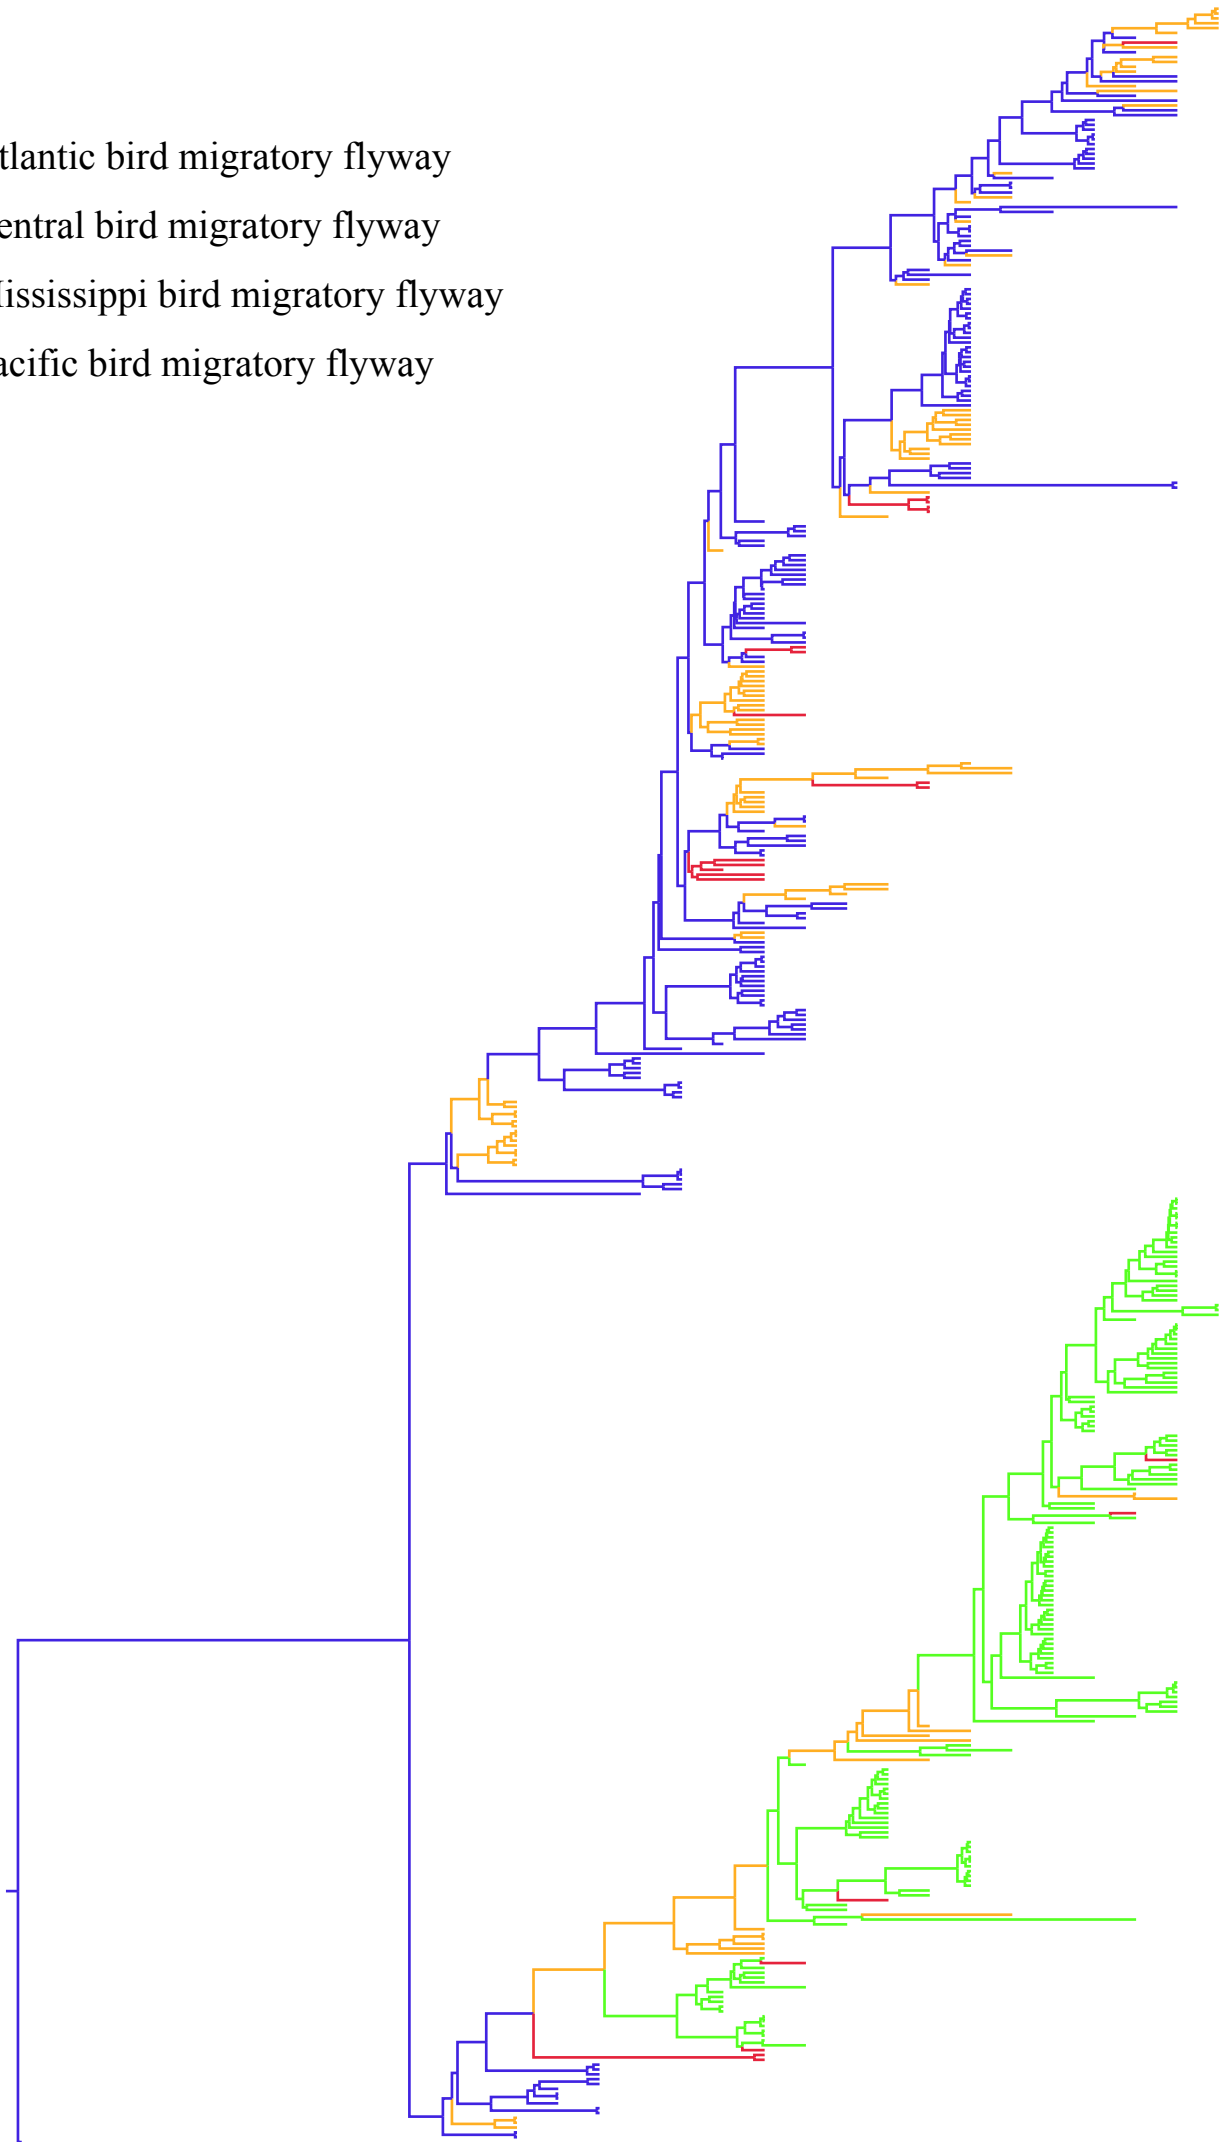

**Figure S3**

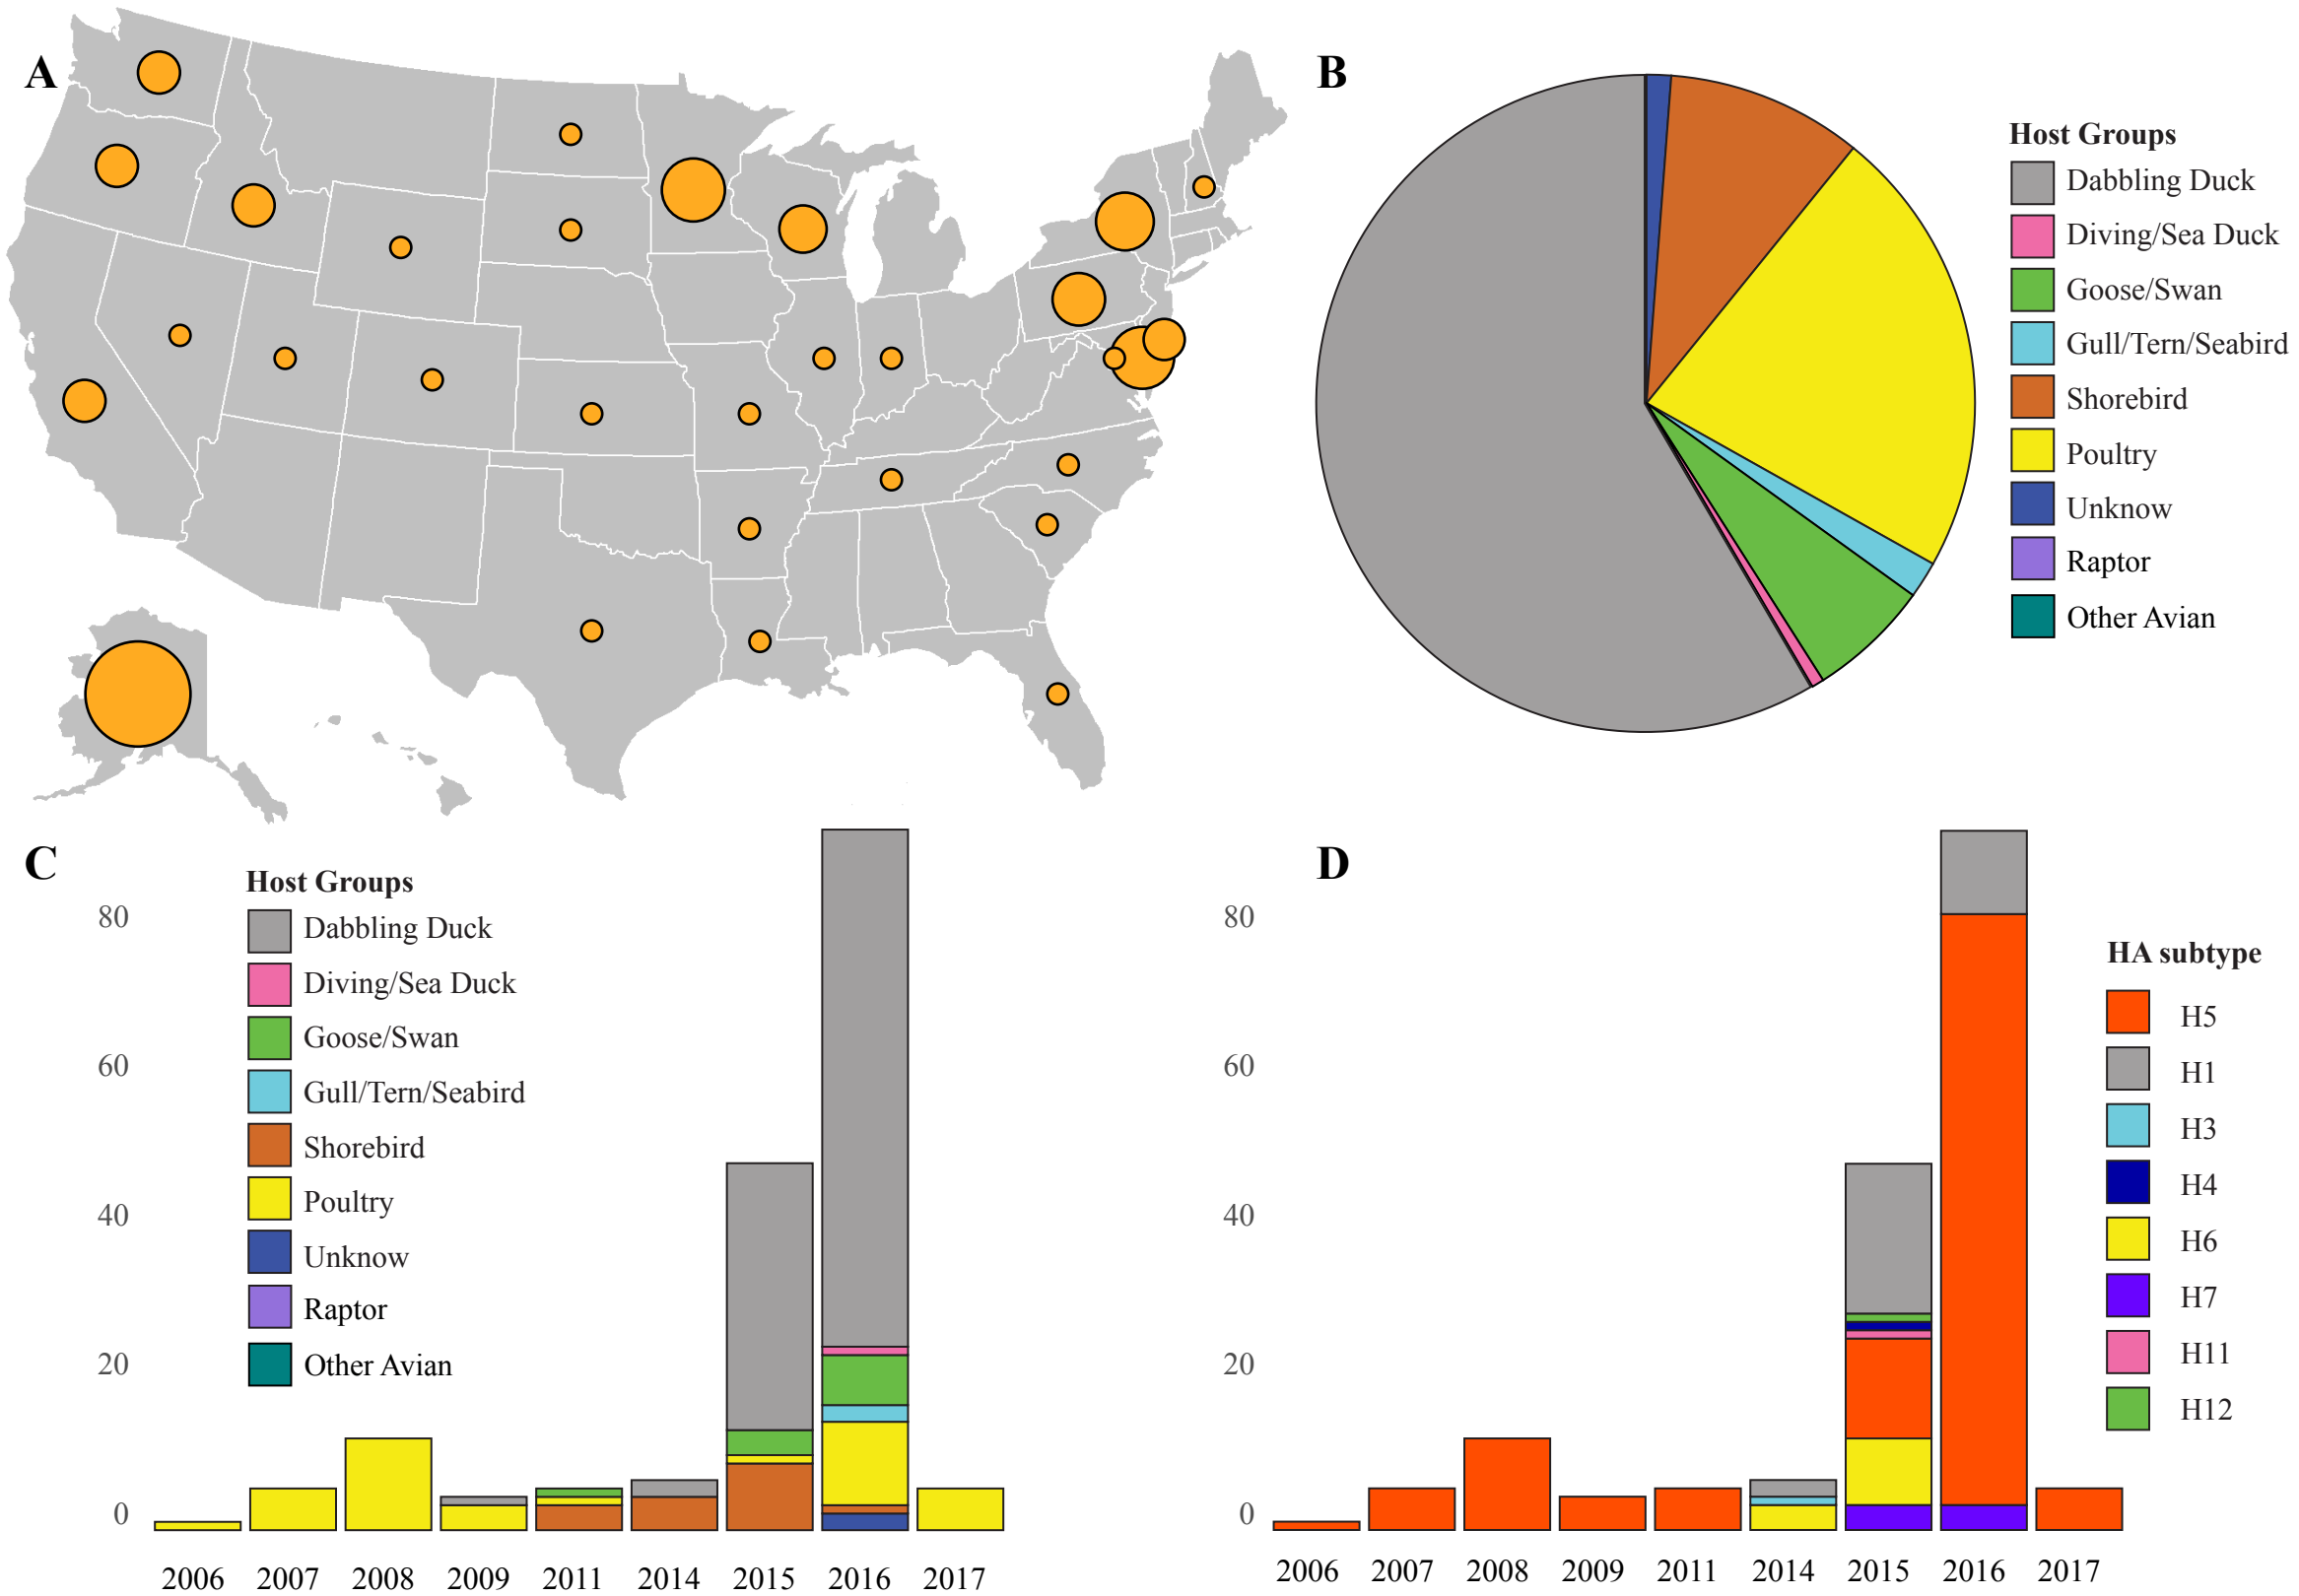

**Figure S4**

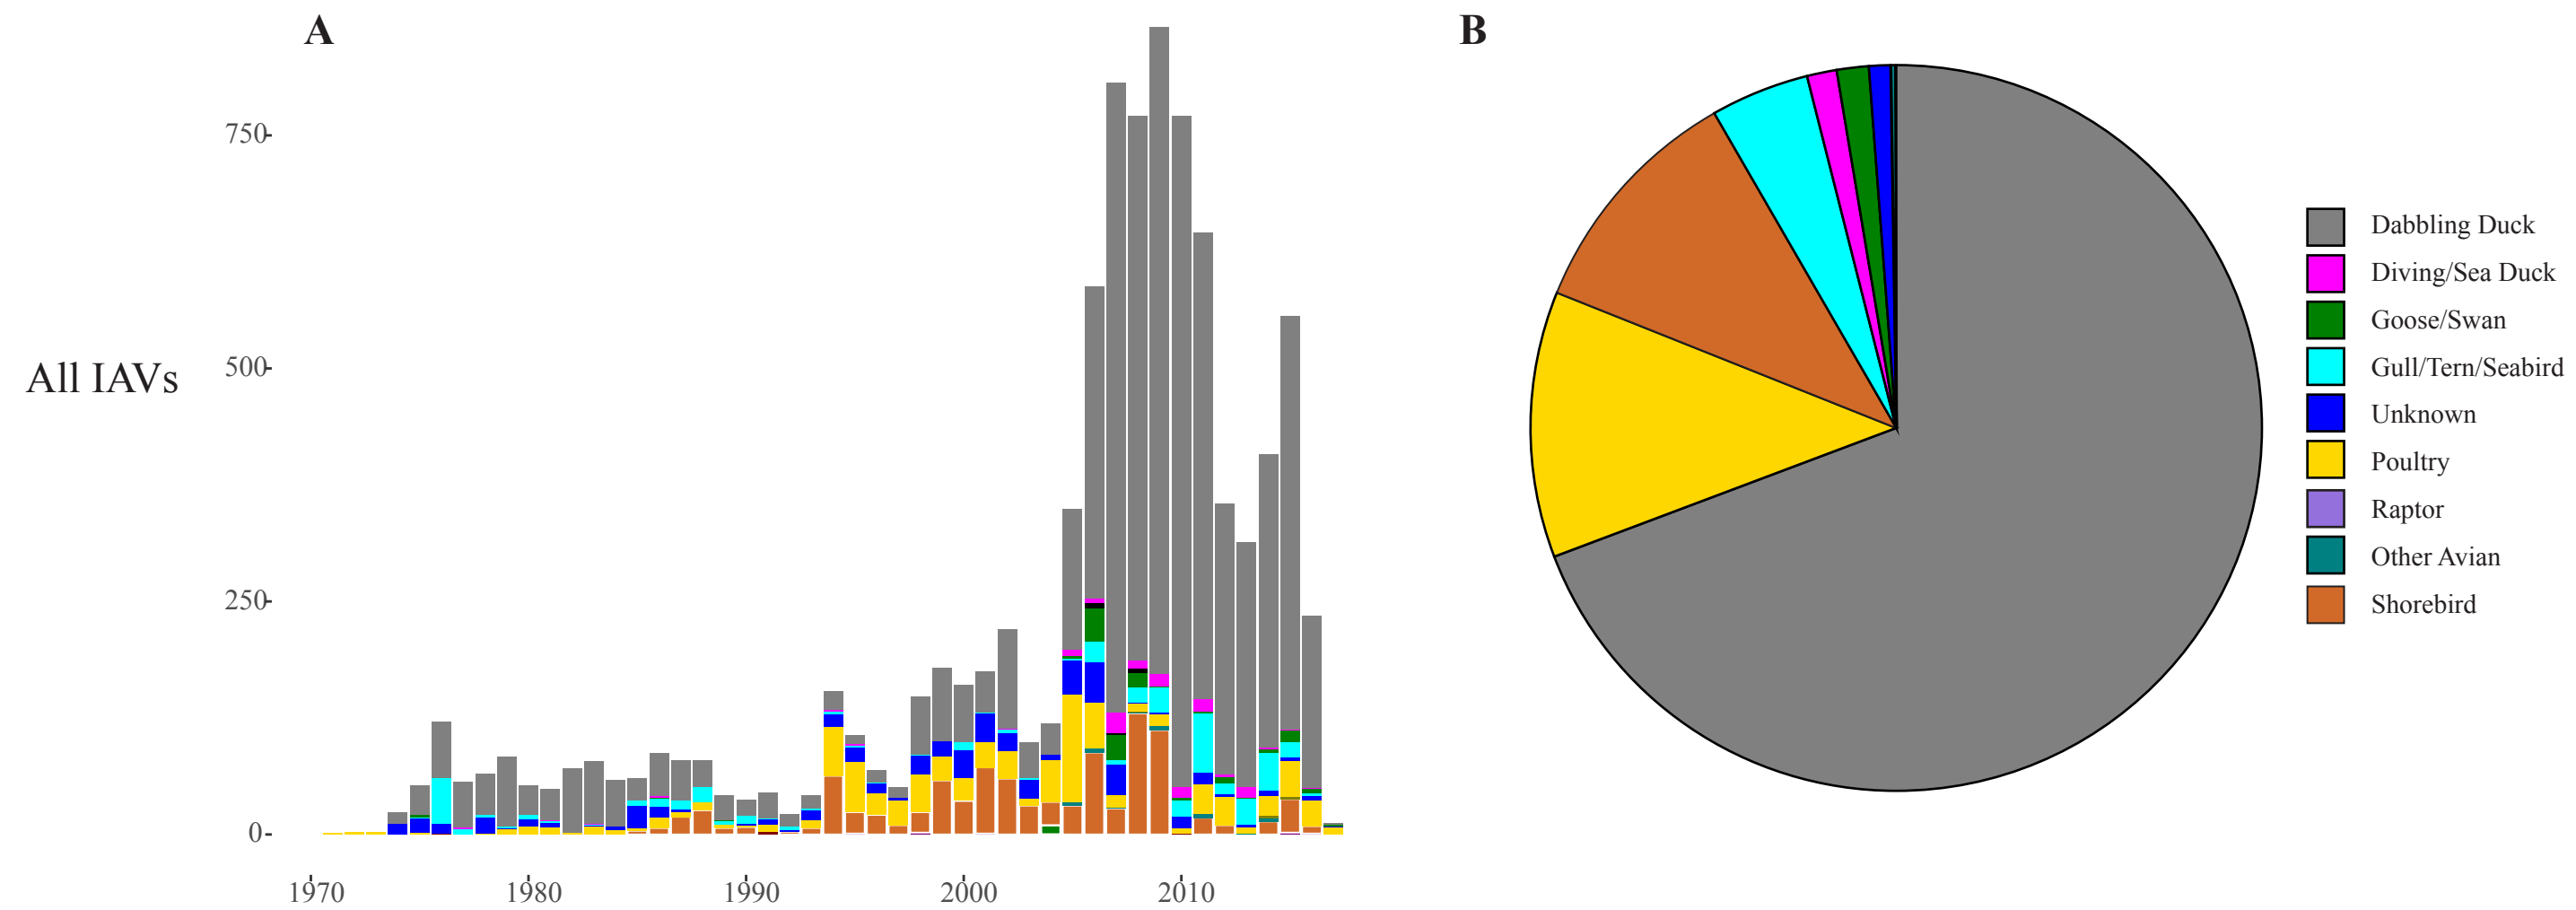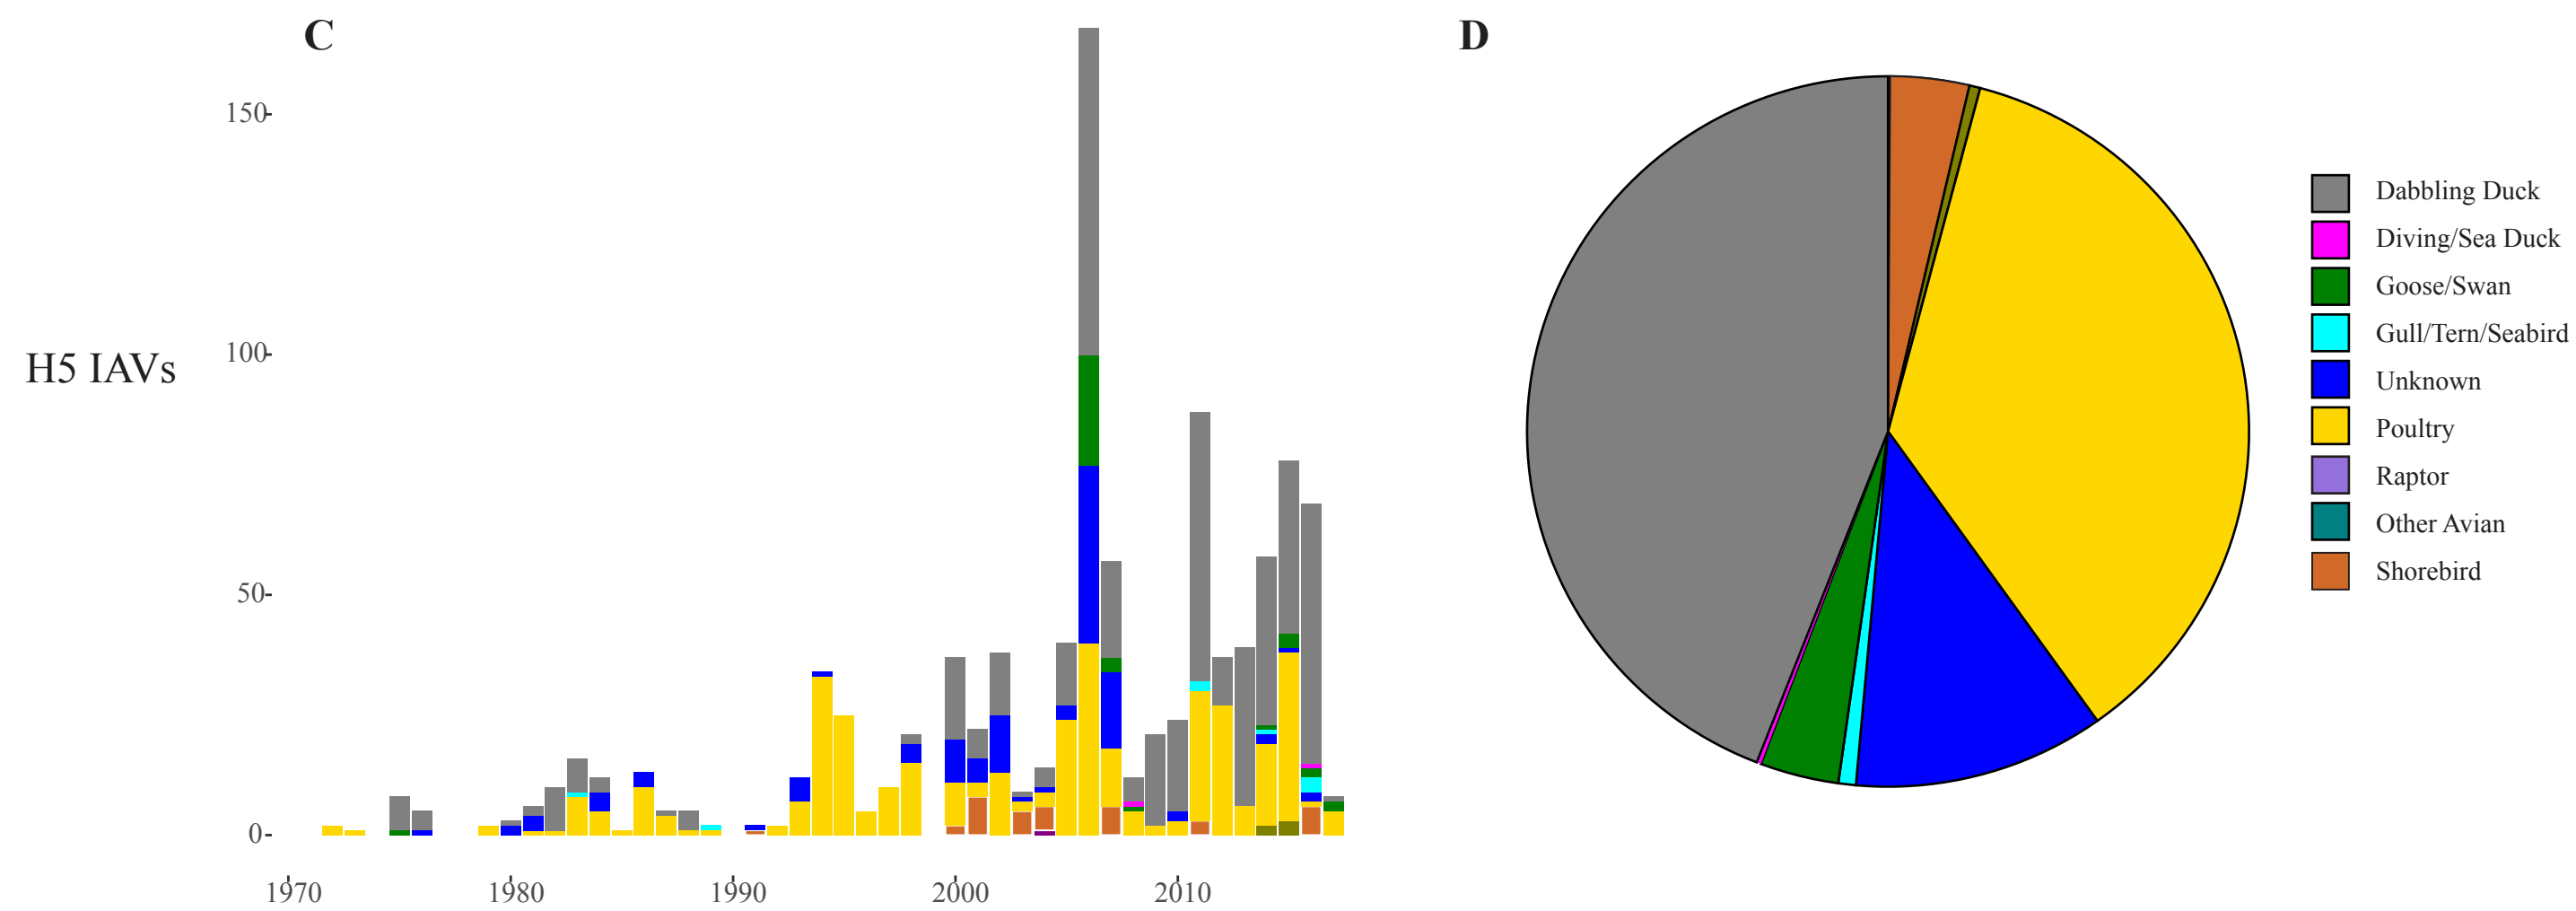

## Supplementary Tables

**Table S1.** Possible progenitor genes for H5 low pathogenic avian influenza viruses detected in domestic poultry in the United States and Canada (2001-2017).

| Representative isolate                  | Introduction       | HA                                                |          | NA                                               |          |
|-----------------------------------------|--------------------|---------------------------------------------------|----------|--------------------------------------------------|----------|
|                                         |                    | Isolate                                           | Identity | Isolate                                          | Identity |
| A/turkey/Wisconsin/170071461/2017       | CPF-WI-2017(H5N2)  | A/mallard/Minnesota/UGAI16-4786/2016(H5N5)        | 99.31    | A/mallard duck/Ohio/15OS5882/2015(H6N2)          | 99.0     |
| A/turkey/Missouri/160140377/2016        | CPF-MO-2016(H5N1)  | A/Canada goose/DelawareBay/601/2016(H5N1)         | 98.82    | A/mallard/Ohio/15OS4367/2015(H1N1)               | 99.6     |
| A/turkey/MB/FAV10/2010                  | CPF-MB-2010(H5N2)  | A/mallard/Minnesota/464334/2006(H5N2)             | 99.02    | A/northern shoveler/Missouri/298/2009(H9N2)      | 99.7     |
| A/turkey/VA/50547718/2007               | CPF-VA-2007(H5N1)  | A/mallard/PA/454069-9/2006(H5N1)                  | 99.20    | A/mallard/ON/499/2005(H5N1)                      | 99.4     |
| A/turkey/CA/D0208651C/02                | CPF-CA-2002(H5N2)  | A/mallard/Minnesota/346250/2000(H5N2)             | 98.51    | Genomic sequence not available                   |          |
| A/duck/NewYork/16-020978-2orig/2016     | LBM-NY-2016(H5N2)  | No possible progenitor gene detected in wild bird |          |                                                  |          |
| A/chicken/NewJersey/150026592/2015      | LBM-NJ-2015(H5N1)  | A/northern pintail/Ohio/15OS5861/2015(H5N2)       | 99.29    | A/mallard/Maryland/13OS3036/2014(H1N1)           | 99.4     |
| A/duck/NewJersey/11-064045-002/2011     | LBM-NJ-2011(H5N2)  | A/mallard/Ohio/11OS1961/2011(H5N2)                | 99.60    | A/mallard/Ohio/11OS1961/2011(H5N2)               | 99.8     |
| A/duck/NewYork/08-000759-001/2008       | LBM-NY-2007(H5N2)  | No possible progenitor gene detected in wild bird |          | A/mallard/Michigan/466372-3/2006(H5N2)           | 99.4     |
| A/chicken/NewJersey/2514/2008           | LBM-NJ-2007(H5N2)  | A/mallard/Maryland/07OS2435/2007(H5N2)            | 98.96    | A/northern shoveler/California/8855/2008(H5N2)   | 98.9     |
| A/turkey/NewYork/465977/2006            | LBM-NY-2006(H5N2)  | A/mallard/Michigan/466372-3/2006(H5N2)            | 99.66    | A/mallard/Michigan/466372-3/2006(H5N2)           | 99.8     |
| A/chicken/Pennsylvania/4460807/2006     | LBM-NJ-2006(H5N2)a | A/mallard/Maryland/897/2004(H5N2)                 | 98.91    | A/mallard/Ontario/15873/2005(H3N2)               | 99.5     |
| A/avian/NewYork/448534/2006             | LBM-NJ-2006(H5N2)b | A/mallard/Maryland/897/2004(H5N2)                 | 98.62    | A/mallard/Michigan/466372-3/2006(H5N2)           | 98.8     |
| A/duck/NJ/1172287/2001                  | LBM-NJ-2001(H5N2)  | A/ruddy turnstone/New Jersey/2242/2000(H5N3)      | 98.42    | A/green-winged teal/Ohio/203/1998(H6N2)          | 98.7     |
| A/mallard/Michigan/15-031493-1orig/2015 | BYP-MI-2015(H5N2)  | A/northern pintail/Ohio/15OS5861/2015(H5N2)       | 99.54    | A/mallard duck/Ohio/15OS5289/2015(H5N2)          | 99.1     |
| A/duck/Oregon/4596743/2006              | BYP-OR-2006(H5N2)  | A/mallard/British Columbia/18311/2006(H5N2)       | 99.71    | A/American widgeon/Oregon/467919/2006(H5N2)      | 100.0    |
| A/quail/California/K1400794/2014        | GBP-CA-2014(H5N8)  | A/mallard/California/1375/2013(H5N5)              | 98.23    | A/northern pintail/Alaska/916/2013(H6N8)         | 99.3     |
| A/pheasant/Idaho/08-002590-63/2008      | GBP-ID-2008(H5N8)  | A/mallard/British Columbia/18311/2006(H5N2)       | 98.26    | A/blue-winged teal/Minnesota/Sg-00037/2007(H3N8) | 98.4     |

| Representative isolate                | Introduction       | PB2                                               |          | PB1                                                     |          |
|---------------------------------------|--------------------|---------------------------------------------------|----------|---------------------------------------------------------|----------|
|                                       |                    | Isolate                                           | Identity | Isolate                                                 | Identity |
| A/turkey/Wisconsin/170071461/2017     | CPF-WI-2017(H5N2)  | A/blue-wingedteal/Texas/UGAI15-6626/2015(H3N8)    | 98.99    | A/mallard/Ohio/15OS4000/2015(H1N1)                      | 99.62    |
| A/turkey/Missouri/160140377/2016      | CPF-MO-2016(H5N1)  | A/blue-wingedteal/Ohio/15OS3662/2015(H4N6)        | 99.52    | A/mallard/Pennsylvania/UGAI15-5019/2015(H3N8)           | 99.60    |
| A/turkey/MB/FAV10/2010                | CPF-MB-2010(H5N2)  | A/northernshoveler/California/HKWF2031/2008(H7N3) | 99.26    | A/Americangreen-wingedteal/Illinois/10OS3589/2010(H6N2) | 99.18    |
| A/turkey/VA/50547718/2007             | CPF-VA-2007(H5N1)  | A/waterfowl/Colorado/457952-2/2006(H5N2)          | 99.05    | A/mallard/Maryland/07OS66/2007(H10N7)                   | 98.87    |
| A/turkey/CA/D0208651C/02              | CPF-CA-2002(H5N2)  | Genomic sequence not available                    |          |                                                         |          |
| A/duck/NewYork/16-020978-2orig/2016   | LBM-NY-2016(H5N2)  | No possible progenitor gene detected in wild bird |          |                                                         |          |
| A/chicken/NewJersey/150026592/2015    | LBM-NJ-2015(H5N1)  | A/blue-wingedteal/Iowa/13OS2367/2013(H4N8)        | 99.34    | A/mallard/Wisconsin/13OS2767/2013(H3N8)                 | 99.30    |
| A/duck/NewJersey/11-064045-002/2011   | LBM-NJ-2011(H5N2)  | A/northernpintail/Wisconsin/10OS2857/2010(H5N2)   | 99.48    | A/mallard/Michigan/10OS1491/2010(H4N6)                  | 99.57    |
| A/duck/NewYork/08-000759-001/2008     | LBM-NY-2007(H5N2)  | No possible progenitor gene detected in wild bird |          |                                                         |          |
| A/chicken/NewJersey/2514/2008         | LBM-NJ-2007(H5N2)  | A/mallardduck/Minnesota/Sg-00117/2007(H3N8)       | 99.02    | A/mallard/Ontario/26078/2007(H5N1)                      | 99.30    |
| A/turkey/NewYork/465977/2006          | LBM-NY-2006(H5N2)  | A/mallard/Alberta/166/2006(H1N1)                  | 99.18    | A/mallard/Ohio/1506/2006(H3N6)                          | 99.43    |
| A/chicken/Pennsylvania/4460807/2006   | LBM-NJ-2006(H5N2)a | A/mallard/Quebec/11103/2006(H4N6)                 | 99.78    | A/mallard/Maryland/897/2004(H5N2)                       | 99.22    |
| A/avian/NewYork/448534/2006           | LBM-NJ-2006(H5N2)b | A/mallard/Ohio/657/2002(H4N6)                     | 99.18    | A/mallard/Ohio/793/2004(H11N2)                          | 99.14    |
| A/duck/NJ/1172287/2001                | LBM-NJ-2001(H5N2)  | A/mallard/Alberta/125/1999(H11N6)                 | 99.18    | A/pintail/Ohio/226/1998(H6N2)                           | 98.47    |
| mallard/Michigan/15-031493-1orig/2015 | BYP-MI-2015(H5N2)  | A/green-wingedteal/Ohio/14OS2001/2014(H6N2)       | 99.35    | A/mallardduck/Ohio/15OS4285/2015(H3N8)                  | 99.65    |
| A/duck/Oregon/4596743/2006            | BYP-OR-2006(H5N2)  | A/Americanwidgeon/Oregon/467919/2006(H5N2)        | 99.83    | A/mallard/BritishColumbia/18311/2006(H5N2)              | 99.91    |
| A/quail/California/K1400794/2014      | GBP-CA-2014(H5N8)  | A/woodduck/Wisconsin/11OS2912/2011(H3N6)          | 98.40    | A/mallard/Idaho/ND0002645/2013(H4N6)                    | 99.34    |
| A/pheasant/Idaho/08-002590-63/2008    | GBP-ID-2008(H5N8)  | A/ruddyturnstone/NewJersey/AI06-582/2006(H6N7)    | 98.40    | A/mallard/Quebec/11063/2006(H2N3)                       | 98.83    |

| Representative isolate                | Introduction       | PA                                                |          | NP                                             |          |
|---------------------------------------|--------------------|---------------------------------------------------|----------|------------------------------------------------|----------|
|                                       |                    | Isolate                                           | Identity | Isolate                                        | Identity |
| A/turkey/Wisconsin/170071461/2017     | CPF-WI-2017(H5N2)  | A/mallard/Ohio/15OS3602/2015(H3N6)                | 99.59    | A/blue-wingedteal/Missouri/15OS6536/2016(H1N1) | 99.48    |
| A/turkey/Missouri/160140377/2016      | CPF-MO-2016(H5N1)  | A/Canadagoose/DelawareBay/601/2016(H5N1)          | 99.35    | A/blue-wingedteal/Ohio/15OS3662/2015(H4N6)     | 99.73    |
| A/turkey/MB/FAV10/2010                | CPF-MB-2010(H5N2)  | A/Americanblackduck/Illinois/3854/2009(H11N9)     | 99.09    | A/blue-wingedteal/Texas/AI10-3844/2010(H4N6)   | 99.41    |
| A/turkey/VA/50547718/2007             | CPF-VA-2007(H5N1)  | A/green-wingedteal/NewBrunswick/02630/2007(H4N6)  | 98.68    | A/shorebird/Delaware/472/2007(H5N1)            | 99.74    |
| A/turkey/CA/D0208651C/02              | CPF-CA-2002(H5N2)  | Genomic sequence not available                    |          |                                                |          |
| A/duck/NewYork/16-020978-2orig/2016   | LBM-NY-2016(H5N2)  | No possible progenitor gene detected in wild bird |          |                                                |          |
| A/chicken/NewJersey/150026592/2015    | LBM-NJ-2015(H5N1)  | A/Americanblackduck/Maryland/13OS2956/2013(H11N9) | 98.70    | A/mallard/Ohio/14OS3244/2014(mixed)            | 99.60    |
| A/duck/NewJersey/11-064045-002/2011   | LBM-NJ-2011(H5N2)  | A/mallard/Ohio/11OS2078/2011(H1N1)                | 99.82    | A/mallard/Ohio/11OS2049/2011(H3N6)             | 99.87    |
| A/duck/NewYork/08-000759-001/2008     | LBM-NY-2007(H5N2)  | No possible progenitor gene detected in wild bird |          |                                                |          |
| A/chicken/NewJersey/2514/2008         | LBM-NJ-2007(H5N2)  | A/mallard/Ohio/1506/2006(H3N6)                    | 98.31    | A/mallard/Quebec/11111/2006(H11N9)             | 99.21    |
| A/turkey/NewYork/465977/2006          | LBM-NY-2006(H5N2)  | A/mallard/Ohio/468159-4/2006(H5N2)                | 99.49    | A/blue-wingedteal/Ohio/1918/2006(H6N5)         | 99.80    |
| A/chicken/Pennsylvania/4460807/2006   | LBM-NJ-2006(H5N2)a | A/green-wingedteal/Ohio/1747/2005(H11N2)          | 99.50    | A/mallard/Maryland/897/2004(H5N2)              | 99.61    |
| A/avian/NewYork/448534/2006           | LBM-NJ-2006(H5N2)b | A/mallard/Ohio/664/2002(H6N6)                     | 99.05    | A/snowgoose/Maryland/364/2005(H6N1)            | 98.30    |
| A/duck/NJ/1172287/2001                | LBM-NJ-2001(H5N2)  | A/gull/DelawareBay/18/2000(H6N1)                  | 99.13    | A/shorebird/DelawareBay/277/2000(H9N7)         | 99.03    |
| mallard/Michigan/15-031493-1orig/2015 | BYP-MI-2015(H5N2)  | A/blue-wingedteal/Texas/AI13-3971/2013(H3N8)      | 98.86    | A/mallard/Maryland/14OS2911/2015(h7n3)         | 99.41    |
| A/duck/Oregon/4596743/2006            | BYP-OR-2006(H5N2)  | A/Americanwidgeon/Oregon/467919/2006(H5N2)        | 99.86    | A/Americanwidgeon/Oregon/467919/2006(H5N2)     | 99.81    |
| A/quail/California/K1400794/2014      | GBP-CA-2014(H5N8)  | A/northernshoveler/Illinois/12OS4957/2012(H6N2)   | 99.05    | A/mallard/California/1400/2013(H5N5)           | 99.27    |
| A/pheasant/Idaho/08-002590-63/2008    | GBP-ID-2008(H5N8)  | A/pintail/Alberta/68/2005(H1N1)                   | 98.70    | A/whitefrontgoose/Alaska/477003/2007(H5N2)     | 98.18    |



| Representative isolate                | Introduction       | MP                                                     |          | NS                                                 |          |
|---------------------------------------|--------------------|--------------------------------------------------------|----------|----------------------------------------------------|----------|
|                                       |                    | Isolate                                                | Identity | Isolate                                            | Identity |
| A/turkey/Wisconsin/170071461/2017     | CPF-WI-2017(H5N2)  | A/mallardduck/Ohio/15OS4285/2015(H3N8)                 | 99.40    | A/mallard/Ohio/15OS5649/2015(H10N1)                | 99.88    |
| A/turkey/Missouri/160140377/2016      | CPF-MO-2016(H5N1)  | A/mallard/Minnesota/UGAI15-6563/2015(H5N9)             | 100.00   | A/green-wingedteal/Ohio/15OS5438/2015(H3N2)        | 99.88    |
| A/turkey/MB/FAV10/2010                | CPF-MB-2010(H5N2)  | A/mallard/Missouri/132/2009(H2N3)                      | 99.60    | A/Americanwigeon/Missouri/10MO0530/2010<br>(mixed) | 99.77    |
| A/turkey/VA/50547718/2007             | CPF-VA-2007(H5N1)  | A/ruddyturnstone/Delaware/81/2001(H10N7)               | 99.70    | A/green-wingedteal/Ohio/81/1999(H11N2)             | 98.47    |
| A/turkey/CA/D0208651C/02              | CPF-CA-2002(H5N2)  | A/mallard/Minnesota/31/2000(H2N9)                      | 98.99    | Genomic sequence not available                     |          |
| A/duck/NewYork/16-020978-2orig/2016   | LBM-NY-2016(H5N2)  | No possible progenitor gene detected                   |          |                                                    |          |
| A/chicken/NewJersey/150026592/2015    | LBM-NJ-2015(H5N1)  | A/blue-wingedteal/Ohio/12OS2154/2012(H3N2)             | 99.61    | A/mallard/Ohio/11OS1982/2011(mixed)                | 99.28    |
| A/duck/NewJersey/11-064045-002/2011   | LBM-NJ-2011(H5N2)  | A/mallard/Ohio/11OS1961/2011(H5N2)                     | 99.80    | A/mallard/Ohio/793/2004(H11N2)                     | 99.31    |
| A/duck/NewYork/08-000759-001/2008     | LBM-NY-2007(H5N2)  | A/mallard/Ohio/684/2002(H4N6)                          | 99.20    | A/shorebird/DelawareBay/288/1999(Mixed)            | 98.27    |
| A/chicken/NewJersey/2514/2008         | LBM-NJ-2007(H5N2)  | A/mallard/Ohio/793/2004(H11N2)                         | 99.60    | A/mallard/Ontario/26078/2007(H5N1)                 | 99.30    |
| A/turkey/NewYork/465977/2006          | LBM-NY-2006(H5N2)  | A/greenwingedteal/Delaware/468157-6/2006(H5N2)         | 99.80    | A/mallard/Kentucky/472048-2/2006(H5N2)             | 99.88    |
| A/chicken/Pennsylvania/4460807/2006   | LBM-NJ-2006(H5N2)a | A/mallard/Quebec/11189/2006(H4N6)                      | 100.00   | A/mallard/Maryland/718/2004(H8N4)                  | 99.19    |
| A/avian/NewYork/448534/2006           | LBM-NJ-2006(H5N2)b | A/mallard/Ohio/684/2002(H4N6)                          | 98.80    | A/mallard/Ohio/667/2002(H4N6)                      | 99.31    |
| A/duck/NJ/1172287/2001                | LBM-NJ-2001(H5N2)  | A/mallard/Alberta/279/1996(H11N9)                      | 99.09    | A/mallard/Minnesota/401/1999(H6N0)                 | 99.65    |
| mallard/Michigan/15-031493-1orig/2015 | BYP-MI-2015(H5N2)  | A/blue-wingedteal/Louisiana/AI12-4628/2012(mixed)      | 99.40    | A/gadwall/Ohio/15OS5508/2015(mixed)                | 99.65    |
| A/duck/Oregon/4596743/2006            | BYP-OR-2006(H5N2)  | A/mallard/BritishColumbia/07594/2005(H5N2)             | 100.00   | A/mallard/BritishColumbia/07594/2005(H5N2)         | 100.00   |
| A/quail/California/K1400794/2014      | GBP-CA-2014(H5N8)  | A/Americangreen-wingedteal/Alaska/44493-588/2009(H3N8) | 99.40    | A/mallard/Mississippi/12OS443/2012(H10N1)          | 99.06    |
| A/pheasant/Idaho/08-002590-63/2008    | GBP-ID-2008(H5N8)  | A/lessersnowgoose/Alaska/44301-116/2007(H2N3)          | 99.20    | A/glaucous-wingedgull/Alaska/392/2011(H5N2)        | 99.42    |

**Table S2.** Statistical supports generated from phylogeographic analysis of geographical distribution of four bird migratory flyways associated with sub-lineage 1 and sub-lineage 2 of H5 genes of low pathogenic avian influenza viruses in the United States and Canada.

| Flyways     |             | Indicator <sup>a</sup>                 | Bayes factor <sup>a</sup> | Support level <sup>b</sup> |
|-------------|-------------|----------------------------------------|---------------------------|----------------------------|
| From        | To          |                                        |                           |                            |
| Atlantic    | Mississippi | 1.00                                   | >10000                    | Decisive                   |
| Atlantic    | Central     | 0.81                                   | 9.63                      | Support                    |
| Atlantic    | Pacific     | No significant transition was observed |                           |                            |
| Mississippi | Atlantic    | 0.84                                   | 11.74                     | Strong support             |
| Mississippi | Central     | 0.94                                   | 36.32                     | Strong support             |
| Mississippi | Pacific     | 0.99                                   | 1838.37                   | Decisive                   |
| Central     | Atlantic    | No significant transition was observed |                           |                            |
| Central     | Mississippi | No significant transition was observed |                           |                            |
| Central     | Pacific     | No significant transition was observed |                           |                            |
| Pacific     | Atlantic    | No significant transition was observed |                           |                            |
| Pacific     | Central     | 1.00                                   | >10000                    | Decisive                   |
| Pacific     | Mississippi | 0.77                                   | 7.72                      | Support                    |

<sup>a</sup>Only indicator  $\geq 0.5$  and BF  $\geq 3$  are considered as significant transition; <sup>b</sup> Statistical support levels were interpreted from Bayes factors as follows: Bayes factor  $<3$  indicates no support;  $3 \leq$  Bayes factor  $<10$  indicates support;  $10 \leq$  Bayes factor  $<100$  indicates strong support;  $100 \leq$  Bayes factor  $<1000$  indicates very strong support; and Bayes factor  $\geq 1,000$  indicates decisive support.

**Table S3.** Statistical supports generated from phylogeographic analyses of H5 low pathogenic avian influenza viruses for three recent introductions to the domestic poultry in the United States and Canada.

| <b>H5 introduction</b> | <b>Segment</b> | <b>Host group</b> | <b>Indicator<sup>a</sup></b>       | <b>Bayes factor<sup>a</sup></b> | <b>Support level<sup>b</sup></b> |
|------------------------|----------------|-------------------|------------------------------------|---------------------------------|----------------------------------|
| CPF-WI-2017(H5N2)      | PB2            | Dabbling Duck     | 0.92                               | 35.12                           | Strong support                   |
|                        | PB1            | Dabbling Duck     | 0.65                               | 19.37                           | Strong support                   |
|                        | PA             | Dabbling Duck     | 0.74                               | 17.61                           | Strong support                   |
|                        | HA             | Dabbling Duck     | 0.69                               | 29.87                           | Strong support                   |
|                        | NP             | Dabbling Duck     | 0.61                               | 8.15                            | Support                          |
|                        | NA             | Dabbling Duck     | 0.56                               | 6.59                            | Support                          |
|                        | MP             | Dabbling Duck     | 0.77                               | 20.91                           | Strong support                   |
|                        | NS             | Dabbling Duck     | 0.81                               | 17.83                           | Strong support                   |
| CPF-MO-2016(H5N1)      | PB2            | Goose/Swan        | 0.95                               | 149.91                          | Very strong support              |
|                        | PB1            | Goose/Swan        | 0.78                               | 25.49                           | Strong support                   |
|                        | PA             | Goose/Swan        | 0.9                                | 68.06                           | Strong support                   |
|                        | HA             | Goose/Swan        | 0.61                               | 20.52                           | Strong support                   |
|                        | NP             |                   | No significant transition observed |                                 |                                  |
|                        | NA             |                   | No significant transition observed |                                 |                                  |
|                        | MP             | Goose/Swan        | 0.58                               | 15.69                           | Strong support                   |
|                        | NS             | Goose/Swan        | 0.85                               | 48.47                           | Strong support                   |
| LBM-NJ-2015(H5N1)      | PB2            | Dabbling Duck     | 0.88                               | 53.98                           | Strong support                   |
|                        | PB1            |                   | No significant transition observed |                                 |                                  |
|                        | PA             |                   | No significant transition observed |                                 |                                  |
|                        | HA             |                   | No significant transition observed |                                 |                                  |
|                        | NP             | Diving/Sea Duck   | 0.95                               | 169.25                          | Very strong support              |
|                        | NA             | Dabbling Duck     | 0.56                               | 8.12                            | Support                          |
|                        | MP             |                   | No significant transition observed |                                 |                                  |
|                        | NS             | Goose/Swan        | 0.54                               | 9.55                            | Support                          |

<sup>a</sup>Only indicator  $\geq 0.5$  and BF  $\geq 3$  were considered as significant transmission and all statistical support level were indicated in the last column; <sup>b</sup> Statistical support levels were interpreted from Bayes factors as follows: Bayes factor  $<3$  indicates no support;  $3 \leq$  Bayes factor  $<10$  indicates support;  $10 \leq$  Bayes factor  $<100$  indicates strong support;  $100 \leq$  Bayes factor  $<1000$  indicates very strong support; and Bayes factor  $\geq 1,000$  indicates decisive support.

**Table S4.** Statistical supports generated from phylogeographic analyses of H5 low pathogenic avian influenza viruses introduced to domestic poultry in the United States and Canada (2001-2017).

| H5                 | Representative isolate                  | PB2                                            |                 | PB1  |        | PA   |        | HA   |        | NP   |        | NA   |         | MP   |        | NS   |         |
|--------------------|-----------------------------------------|------------------------------------------------|-----------------|------|--------|------|--------|------|--------|------|--------|------|---------|------|--------|------|---------|
|                    |                                         | Host <sup>a</sup>                              | BF <sup>b</sup> | Host | BF      | Host | BF     | Host | BF      |
| CPF-WI-2017(H5N2)  | A/turkey/Wisconsin/17-007146-1/2017     | DaD                                            | 35.12           | DaD  | 19.37  | DaD  | 17.61  | DaD  | 29.87  | DaD  | 8.15   | DaD  | 6.59    | DaD  | 20.91  | DaD  | 17.83   |
| CPF-MO-2016(H5N1)  | A/turkey/Missouri/16_014037_7/2016      | GS                                             | 149.91          | GS   | 25.49  | GS   | 68.06  | GS   | 20.52  |      |        |      |         | GS   | 15.69  | GS   | 48.47   |
| CPF-MB-2010(H5N2)  | A/turkey/MB/FAV10/2010                  |                                                |                 | DaD  | 8.08   |      |        | DaD  | 5.82   | DaD  | 3.24   | DaD  | 189.74  | DaD  | 27.07  | Unk  | 17.18   |
| CPF-VA-2007(H5N1)  | A/turkey/Virginia/505477-17/2007        |                                                |                 | DaD  | 8.28   | DiD  | 15.68  | DaD  | 10.72  | Unk  | 71.55  | DaD  | 3.31    | SB   | 154.54 | Unk  | 31.5    |
| CPF-CA-2002(H5N2)  | A/turkey/CA/D0208651-C/02               | Complete genome not available                  |                 |      |        |      |        |      |        |      |        |      |         |      |        |      |         |
| LBM-NY-2016(H5N2)  | A/duck/NewYork/16-020978-2orig/2016     | Related wild bird origin samples not available |                 |      |        |      |        |      |        |      |        |      |         |      |        |      |         |
| LBM-NJ-2015(H5N1)  | A/chicken/New_Jersey/15_002659_2/2015   | DaD                                            | 53.98           |      |        |      |        |      |        | DiD  | 169.25 | DaD  | 8.12    |      |        | GS   | 9.55    |
| LBM-NJ-2011(H5N2)  | A/duck/NewJersey/11-064045-002/2011     | DaD                                            | 35.09           | DaD  | 9.84   |      |        |      |        | DaD  | 48.01  | DaD  | 68.27   |      |        |      |         |
| LBM-NY-2007(H5N2)  | A/duck/NewYork/08-000759-001/2008       | PT                                             | 90              | PT   | 318.55 | PT   | 32.64  | Unk  | 9.85   | PT   | 189.29 |      |         | PT   | 21.11  | PT   | 32.77   |
| LBM-NJ-2007(H5N2)  | A/chicken/NewJersey/251-4/2008          |                                                |                 | DaD  | 138.71 | DaD  | 10.01  | DaD  | 19.66  | DaD  | 10.41  |      |         |      |        | DiD  | 34.96   |
| LBM-NY-2006(H5N2)  | A/turkey/NewYork/465977/2006            | DaD                                            | 38.89           | DaD  | 9.82   | Unk  | 186.65 | DaD  | 6.89   | Unk  | 785.05 | DaD  | 15.74   | DaD  | 43.03  | DaD  | 1244.25 |
|                    | A/duck/NewYork/492652/2007              | DaD                                            | 17.25           | Unk  | 33.17  | Unk  | 186.65 | DaD  | 6.89   | Unk  | 785.05 | DaD  | 15.74   | DaD  | 43.03  | Unk  | 197.64  |
| LBM-NJ-2006(H5N2)a | A/chicken/Pennsylvania/446080-7/2006    | DaD                                            | >10000          | Unk  | 8.05   | GS   | 6.9    |      |        |      |        | DaD  | 12.21   | DaD  | 21.71  |      |         |
| LBM-NJ-2006(H5N2)b | A/guineafowl/NewJersey/447114/2006      |                                                |                 | DaD  | 8.34   |      |        |      |        | DaD  | 295.97 | DaD  | 49.46   | DaD  | 17.30  |      |         |
| LBM-NJ-2001(H5N2)  | A/duck/ME/151895-7A/2002                | Unk                                            | 64.98           | Unk  | 86.83  | Unk  | 154.74 | Unk  | >10000 | Unk  | 311.27 | Unk  | >10000  | Unk  | >10000 | DaD  | 7.89    |
|                    | A/duck/NJ/117228-7/2001                 |                                                |                 | Unk  | >10000 | Unk  | >10000 | Unk  | >10000 |      |        | Unk  | >10000  | Unk  | >10000 | DaD  | 7.89    |
| BYP-MI-2015(H5N2)  | A/mallard/Michigan/15-031493-1orig/2015 | DaD                                            | 17.94           | DaD  | 30.86  | DiD  | 6.85   |      |        | DaD  | 10.43  | DaD  | 76.97   | DaD  | 41     | DaD  | 42.78   |
| BYP-OR-2006(H5N2)  | A/duck/Oregon/459674-3/2006             | GS                                             | 19.89           | DaD  | 10.38  | DaD  | 90.65  | DaD  | 334.20 | DaD  | 186.65 | DaD  | 2819.74 | DaD  | 36.24  | DaD  | 82.17   |
| GBP-CA-2014(H5N8)  | A/quail/California/K1400794/2014        | DaD                                            | 69.73           | DaD  | 28.42  | DaD  | 73.21  | DaD  | 5.06   | DaD  | 19.51  |      |         | DaD  | 8.05   | DaD  | 50.58   |
| GBP-ID-2008(H5N8)  | A/pheasant/Idaho/08-002590-63/2008      | DaD                                            | 43.14           |      |        |      |        | DaD  | 36.34  | DaD  | 7.69   | DaD  | 8.41    | GS   | 136.51 |      |         |

<sup>a</sup>**DaD:** dabbling duck; **DiD:** diving/sea duck; **GS:** goose/swan; **SB:** shorebird; **GT:** gull/tern/seabird; **Unk:** unknown; **OA:** Other Avian; **PT:** Poultry; <sup>b</sup>Only indicator  $\geq 0.5$  and  $BF \geq 3$  are considered as significant transmission and shown; only most significant functional groups were shown.

**Table S5.** Low pathogenic avian influenza viruses newly sequenced and recovered from domestic poultry (2001-2017) and wild bird samples in the United States and Canada in this study.

| Isolate                                          | Source <sup>a</sup> | Genbank Accession Number |          |          |          |          |          |          |          |
|--------------------------------------------------|---------------------|--------------------------|----------|----------|----------|----------|----------|----------|----------|
|                                                  |                     | PB2                      | PB1      | PA       | HA       | NP       | NA       | MP       | NS       |
| A/mallard/Michigan/15-031493-1/2015(H5N2)        | BYP                 | MH546608                 | MH546609 | MH546610 | MH546611 | MH546612 | MH546613 | MH546614 | MH546615 |
| A/turkey/Minnesota/16-009265-3/2016(H1N1)        | CPF                 | MH546984                 | MH546985 | MH546986 | MH546987 | MH546988 | MH546989 | MH546990 | MH546991 |
| A/turkey/Missouri/16-009707-1/2016(H1N1)         | CPF                 | MH546992                 | MH546993 | MH546994 | MH546995 | MH546996 | MH546997 | MH546998 | MH546999 |
| A/turkey/Wisconsin/17-007146-1/2017(H5N2)        | CPF                 | MH547000                 | MH547001 | MH547002 | MH547003 | MH547004 | MH547005 | MH547006 | MH547007 |
| A/turkey/Wisconsin/17-007146-2/2017(H5N2)        | CPF                 | MH547008                 | MH547009 | MH547010 | MH547011 | MH547012 | MH547013 | MH547014 | MH547015 |
| A/turkey/Wisconsin/17-007319-3/2017(H5N2)        | CPF                 | MH547016                 | MH547017 | MH547018 | MH547019 | MH547020 | MH547021 | MH547022 | MH547023 |
| A/turkey/Wisconsin/17-007981-6/2017(H5N2)        | CPF                 | MH547024                 | MH547025 | MH547026 | MH547027 | MH547028 | MH547029 | MH547030 | MH547031 |
| A/pheasant/Idaho/08-002590-63/2008(H5N8)         | GBP                 | MH546944                 | MH546945 | MH546946 | MH546947 | MH546948 | MH546949 | MH546950 | MH546951 |
| A/chicken/NewJersey/08-000640-006/2008(H5N2)     | LBM                 | MH546336                 | MH546337 | MH546338 | MH546339 | MH546340 | MH546341 | MH546342 | MH546343 |
| A/chicken/Pennsylvania/16-002590-1/2016(H1N1)    | LBM                 | MH546344                 | MH546345 | MH546346 | MH546347 | MH546348 | MH546349 | MH546350 | MH546351 |
| A/duck/NewJersey/11-064045-002/2011(H5N2)        | LBM                 | MH546360                 | MH546361 | MH546362 | MH546363 | MH546364 | MH546365 | MH546366 | MH546367 |
| A/duck/NewYork/07-002127-001/2007(H5N2)          | LBM                 | MH546368                 | MH546369 | MH546370 | MH546371 | MH546372 | MH546373 | MH546374 | MH546375 |
| A/duck/NewYork/08-000759-001/2008(H5N2)          | LBM                 | MH546376                 | MH546377 | MH546378 | MH546379 | MH546380 | MH546381 | MH546382 | MH546383 |
| A/duck/NewYork/08-000937-001/2008(H5N2)          | LBM                 | MH546384                 | MH546385 | MH546386 | MH546387 | MH546388 | MH546389 | MH546390 | MH546391 |
| A/duck/NewYork/09-005059-001/2009(H5N2)          | LBM                 | MH546392                 | MH546393 | MH546394 | MH546395 | MH546396 | MH546397 | MH546398 | MH546399 |
| A/duck/NewYork/16-020978-2/2016(H5N2)            | LBM                 | MH546400                 | MH546401 | MH546402 | MH546403 | MH546404 | MH546405 | MH546406 | MH546407 |
| A/duck/NewYork/16-021467-1/2016(H5N2)            | LBM                 | MH546408                 | MH546409 | MH546410 | MH546411 | MH546412 | MH546413 | MH546414 | MH546415 |
| A/duck/NewYork/16-021916-1/2016(H5N2)            | LBM                 | MH546416                 | MH546417 | MH546418 | MH546419 | MH546420 | MH546421 | MH546422 | MH546423 |
| A/duck/NewYork/16-021920-1/2016(H5N2)            | LBM                 | MH546424                 | MH546425 | MH546426 | MH546427 | MH546428 | MH546429 | MH546430 | MH546431 |
| A/duck/Pennsylvania/07-002198-003/2007(H5N2)     | LBM                 | MH546432                 | MH546433 | MH546434 | MH546435 | MH546436 | MH546437 | MH546438 | MH546439 |
| A/guineafowl/NewJersey/07-002030-001/2007(H5N2)  | LBM                 | MH546480                 | MH546481 | MH546482 | MH546483 | MH546484 | MH546485 | MH546486 | MH546487 |
| A/guineafowl/NewJersey/08-000640-008/2008(H5N2)  | LBM                 | MH546488                 | MH546489 | MH546490 | MH546491 | MH546492 | MH546493 | MH546494 | MH546495 |
| A/guineafowl/NewJersey/08-000841-001/2008(H5N2)  | LBM                 | MH546496                 | MH546497 | MH546498 | MH546499 | MH546500 | MH546501 | MH546502 | MH546503 |
| A/guineafowl/NewYork/08-000170-003/2008(H5N2)    | LBM                 | MH546504                 | MH546505 | MH546506 | MH546507 | MH546508 | MH546509 | MH546510 | MH546511 |
| A/guineafowl/NewYork/08-000238-001/2008(H5N2)    | LBM                 | MH546512                 | MH546513 | MH546514 | MH546515 | MH546516 | MH546517 | MH546518 | MH546519 |
| A/Muscovyduck/NewJersey/07-002376-001/2007(H5N2) | LBM                 | MH546248                 | MH546249 | MH546250 | MH546251 | MH546252 | MH546253 | MH546254 | MH546255 |

|                                                              |            |          |          |          |          |          |          |          |          |
|--------------------------------------------------------------|------------|----------|----------|----------|----------|----------|----------|----------|----------|
| A/Muscovyduck/NewJersey/08-000912-001/2008(H5N2)             | LBM        | MH546256 | MH546257 | MH546258 | MH546259 | MH546260 | MH546261 | MH546262 | MH546263 |
| A/Muscovyduck/NewJersey/16-021456-4/2016(H5N2)               | LBM        | MH546272 | MH546273 | MH546274 | MH546275 | MH546276 | MH546277 | MH546278 | MH546279 |
| A/Muscovyduck/NewJersey/16-021457-2/2016(H5N2)               | LBM        | MH546280 | MH546281 | MH546282 | MH546283 | MH546284 | MH546285 | MH546286 | MH546287 |
| A/Muscovyduck/NewYork/08-000560-002/2008(H5N2)               | LBM        | MH546288 | MH546289 | MH546290 | MH546291 | MH546292 | MH546293 | MH546294 | MH546295 |
| A/Muscovyduck/NewYork/09-002670-002/2009(H5N2)               | LBM        | MH546296 | MH546297 | MH546298 | MH546299 | MH546300 | MH546301 | MH546302 | MH546303 |
| A/Muscovyduck/NewYork/09-005059-002/2009(H5N2)               | LBM        | MH546304 | MH546305 | MH546306 | MH546307 | MH546308 | MH546309 | MH546310 | MH546311 |
| A/pheasant/NewYork/08-000170-002/2008(H5N2)                  | LBM        | MH546952 | MH546953 | MH546954 | MH546955 | MH546956 | MH546957 | MH546958 | MH546959 |
| A/quail/NewYork/07-501360-001/2007(H5N2)                     | LBM        | MH546960 | MH546961 | MH546962 | MH546963 | MH546964 | MH546965 | MH546966 | MH546967 |
| A/American black duck/Alberta/238/2016(H1N1)                 | Wild birds | MF046490 | MF613777 | MF046211 | MF046523 | MF046299 | MF613869 | MF613809 | MF046434 |
| A/Americangreen-wingedteal/Alaska/16-039026-3/2016(H5N2)     | Wild birds | MH546152 | MH546153 | MH546154 | MH546155 | MH546156 | MH546157 | MH546158 | MH546159 |
| A/Americangreen-wingedteal/Alaska/16-039026-4/2016(H5N2)     | Wild birds | MH546160 | MH546161 | MH546162 | MH546163 | MH546164 | MH546165 | MH546166 | MH546167 |
| A/Americangreen-wingedteal/California/16-035443-2/2016(H5N2) | Wild birds | MH546168 | MH546169 | MH546170 | MH546171 | MH546172 | MH546173 | MH546174 | MH546175 |
| A/Americangreen-wingedteal/Idaho/16-028809-5/2016(H5N9)      | Wild birds | MH546176 | MH546177 | MH546178 | MH546179 | MH546180 | MH546181 | MH546182 | MH546183 |
| A/Americangreen-wingedteal/Idaho/16-028809-8/2016(H5N9)      | Wild birds | MH546184 | MH546185 | MH546186 | MH546187 | MH546188 | MH546189 | MH546190 | MH546191 |
| A/Americangreen-wingedteal/Idaho/16-028809-9/2016(H5N9)      | Wild birds | MH546192 | MH546193 | MH546194 | MH546195 | MH546196 | MH546197 | MH546198 | MH546199 |
| A/Americangreen-wingedteal/Nevada/16-033700-1/2016(H5N2)     | Wild birds | MH546200 | MH546201 | MH546202 | MH546203 | MH546204 | MH546205 | MH546206 | MH546207 |
| A/Americangreen-wingedteal/Oregon/17-000383-3/2016(H5N2)     | Wild birds | MH546208 | MH546209 | MH546210 | MH546211 | MH546212 | MH546213 | MH546214 | MH546215 |
| A/Americanwigeon/California/15-039075-7/2015(H5N2)           | Wild birds | MH546216 | MH546217 | MH546218 | MH546219 | MH546220 | MH546221 | MH546222 | MH546223 |
| A/Americanwigeon/Colorado/15-038180-1/2015(H5N2)             | Wild birds | MH546224 | MH546225 | MH546226 | MH546227 | MH546228 | MH546229 | MH546230 | MH546231 |
| A/Americanwigeon/Oregon/17-000383-2/2016(H5N2)               | Wild birds | MH546232 | MH546233 | MH546234 | MH546235 | MH546236 | MH546237 | MH546238 | MH546239 |
| A/Americanwigeon/Utah/15-038912-1/2015(H5N2)                 | Wild birds | MH546240 | MH546241 | MH546242 | MH546243 | MH546244 | MH546245 | MH546246 | MH546247 |
| A/Blue-winged Teal/Louisiana/UGA114-282/2014(H1N1)           | Wild birds | MH341739 | MH341740 | MH341741 | MH341742 | MH341743 | MH341744 | MH341745 | MH341746 |
| A/Blue-winged Teal/Texas/UGA115-5632/2015(H1N1)              | Wild birds | MH341859 | MH341860 | MH341861 | MH341862 | MH341863 | MH341864 | MH341865 | MH341866 |
| A/Blue-winged Teal/Texas/UGA115-6706/2015(H1N1)              | Wild birds | MH341891 | MH341892 | MH341893 | MH341894 | MH341895 | MH341896 | MH341897 | MH341898 |
| A/blue-wingedteal/SouthCarolina/16-042570-1/2016(H7N1)       | Wild birds | MH546320 | MH546321 | MH546322 | MH546323 | MH546324 | MH546325 | MH546326 | MH546327 |
| A/blue-wingedteal/Texas/16-031241-1/2016(H5N1)               | Wild birds | MH546328 | MH546329 | MH546330 | MH546331 | MH546332 | MH546333 | MH546334 | MH546335 |
| A/Cackling Goose/Alaska/UGA115-3902/2015(H6N1)               | Wild birds | KU310460 | KU310461 | KU310462 | KU310463 | KU310464 | KU310465 | KU310466 | KU310467 |
| A/Canada goose/Delaware Bay/601/2016(H5N1)                   | Wild birds | MF613753 | MF046330 | MF046237 | MF046544 | MF046412 | MF046448 | MF613747 | MF046406 |
| A/commonmurre/Alaska/16-000949-1/2016(H5N9)                  | Wild birds | MH546352 | MH546353 | MH546354 | MH546355 | MH546356 | MH546357 | MH546358 | MH546359 |
| A/duck/Florida/16-004497-1/2016(H5N2)                        | Wild birds | MH546144 | MH546145 | MH546146 | MH546147 | MH546148 | MH546149 | MH546150 | MH546151 |
| A/Emperor Goose/Alaska/UGA115-8456/2015(H1N1)                | Wild birds | MH341899 | MH341900 | MH341901 | MH341902 | MH341903 | MH341904 | MH341905 | MH341906 |

|                                                             |            |          |          |          |          |          |          |          |          |
|-------------------------------------------------------------|------------|----------|----------|----------|----------|----------|----------|----------|----------|
| A/emperorgoose/Alaska/16-041335-20/2016(H5N2)               | Wild birds | MH546440 | MH546441 | MH546442 | MH546443 | MH546444 | MH546445 | MH546446 | MH546447 |
| A/emperorgoose/Alaska/17-004479-1/2016(H5N2)                | Wild birds | MH546448 | MH546449 | MH546450 | MH546451 | MH546452 | MH546453 | MH546454 | MH546455 |
| A/emperorgoose/Alaska/17-004479-2/2016(H5N2)                | Wild birds | MH546456 | MH546457 | MH546458 | MH546459 | MH546460 | MH546461 | MH546462 | MH546463 |
| A/gadwall/NorthCarolina/15-037410-2/2015(H5N2)              | Wild birds | MH546464 | MH546465 | MH546466 | MH546467 | MH546468 | MH546469 | MH546470 | MH546471 |
| A/glaucous-wingedgull/Alaska/16-041335-19/2016(H5N2)        | Wild birds | MH546472 | MH546473 | MH546474 | MH546475 | MH546476 | MH546477 | MH546478 | MH546479 |
| A/Greater White-fronted Goose/Alaska/UGAI15-3903/2015(H6N1) | Wild birds | KU310468 | KU310469 | KU310470 | KU310471 | KU310472 | KU310473 | KU310474 | KU310475 |
| A/LAUGHING GULL/DE/341/2011 (H5N3)                          | Wild birds | MF359875 | MF359889 | MF359864 | MF359833 | MF359871 | MF359826 | MF359836 | MF359866 |
| A/lessersnowgoose/Arkansas/16-005566-3/2016(H5N2)           | Wild birds | MH546520 | MH546521 | MH546522 | MH546523 | MH546524 | MH546525 | MH546526 | MH546527 |
| A/lessersnowgoose/Oregon/16-006224-1/2016(H5N3)             | Wild birds | MH546528 | MH546529 | MH546530 | MH546531 | MH546532 | MH546533 | MH546534 | MH546535 |
| A/Mallard Duck/Minnesota/UGAI15-6021/2015(H1N1)             | Wild birds | MH341867 | MH341868 | MH341869 | MH341870 | MH341871 | MH341872 | MH341873 | MH341874 |
| A/Mallard Duck/Minnesota/UGAI15-6522/2015(H1N1)             | Wild birds | MH341875 | MH341876 | MH341877 | MH341878 | MH341879 | MH341880 | MH341881 | MH341882 |
| A/Mallard Duck/Minnesota/UGAI15-6540/2015(H4N1)             | Wild birds | MH341883 | MH341884 | MH341885 | MH341886 | MH341887 | MH341888 | MH341889 | MH341890 |
| A/Mallard Duck/Pennsylvania/UGAI15-4737/2015(H3N1)          | Wild birds | MH341843 | MH341844 | MH341845 | MH341846 | MH341847 | MH341848 | MH341849 | MH341850 |
| A/Mallard Duck/Pennsylvania/UGAI15-4892/2015(H1N1)          | Wild birds | MH341851 | MH341852 | MH341853 | MH341854 | MH341855 | MH341856 | MH341857 | MH341858 |
| A/mallard/Alaska/16-029597-2/2016(H5N2)                     | Wild birds | MH546139 | MH546140 | n/a      | MH546141 | n/a      | MH546142 | n/a      | MH546143 |
| A/mallard/Alaska/16-039026-5/2016(H5N2)                     | Wild birds | MH546536 | MH546537 | MH546538 | MH546539 | MH546540 | MH546541 | MH546542 | MH546543 |
| A/mallard/Alaska/16-041335-1/2016(H5N2)                     | Wild birds | MH546544 | MH546545 | MH546546 | MH546547 | MH546548 | MH546549 | MH546550 | MH546551 |
| A/mallard/Alaska/16-041335-2/2016(H5N2)                     | Wild birds | MH546552 | MH546553 | MH546554 | MH546555 | MH546556 | MH546557 | MH546558 | MH546559 |
| A/mallard/Alberta/195/2016(H1N1)                            | Wild birds | MF613903 | MF613823 | MF046376 | MF613817 | MF046190 | MF046227 | MF613937 | MF046389 |
| A/MALLARD/ALBERTA/21/2014(H1N1)                             | Wild birds | MF359862 | MF359823 | MF359856 | MF359832 | MF359860 | MF359869 | MF359887 | MF359841 |
| A/mallard/Alberta/233/2015(H1N1)                            | Wild birds | MF613685 | MF046567 | MF046452 | MF613674 | MF613755 | MF613940 | MF613812 | MF613776 |
| A/mallard/Alberta/260/2016(H1N1)                            | Wild birds | MF613918 | MF613905 | MF613772 | MF046276 | MF046547 | MF046507 | MF613928 | MF046361 |
| A/MALLARD/ALBERTA/383/2009 (H5N5)                           | Wild birds | MF359852 | MF359870 | MF359842 | MF359890 | MF359882 | MF359872 | MF359876 | MF359861 |
| A/mallard/Alberta/603/2015(H1N1)                            | Wild birds | MF613713 | MF613716 | MF046416 | MF046481 | MF613745 | MF046222 | MF046366 | MF046509 |
| A/mallard/Alberta/606/2015(H5N1)                            | Wild birds | MF046556 | MF046415 | MF046275 | MF613792 | MF046280 | MF046531 | MF046442 | MF046496 |
| A/MALLARD/ALBERTA/616/2015(H1N1)                            | Wild birds | MF359840 | MF359855 | MF359851 | MF359843 | MF359879 | MF359865 | MF359868 | MF359857 |
| A/MALLARD/ALBERTA/678/2015(H1N1)                            | Wild birds | MF359859 | MF359820 | MF359837 | MF359883 | MF359888 | MF359828 | MF359835 | MF359854 |
| A/MALLARD/ALBERTA/759/2015(H1N1)                            | Wild birds | MF359819 | MF359822 | MF359873 | MF359848 | MF359825 | MF359829 | MF359853 | MF359877 |
| A/mallard/California/16-033701-7/2016(H5N2)                 | Wild birds | MH546560 | MH546561 | MH546562 | MH546563 | MH546564 | MH546565 | MH546566 | MH546567 |
| A/mallard/California/16-038989-4/2016(H5N2)                 | Wild birds | MH546568 | MH546569 | MH546570 | MH546571 | MH546572 | MH546573 | MH546574 | MH546575 |
| A/mallard/Idaho/16-034834-1/2016(H5N2)                      | Wild birds | MH546576 | MH546577 | MH546578 | MH546579 | MH546580 | MH546581 | MH546582 | MH546583 |

|                                                |            |          |          |          |          |          |          |          |          |
|------------------------------------------------|------------|----------|----------|----------|----------|----------|----------|----------|----------|
| A/mallard/Idaho/UGA116-1964/2016(H5N9)         | Wild birds | CY235322 | CY235321 | CY235320 | CY235315 | CY235318 | CY235317 | CY235316 | CY235319 |
| A/mallard/Illinois/15-039376-1/2015(H5N6)      | Wild birds | MH546584 | MH546585 | MH546586 | MH546587 | MH546588 | MH546589 | MH546590 | MH546591 |
| A/mallard/Indiana/16-035911-3/2016(H5N2)       | Wild birds | MH546592 | MH546593 | MH546594 | MH546595 | MH546596 | MH546597 | MH546598 | MH546599 |
| A/mallard/Maryland/16-042534-2/2016(H5N2)      | Wild birds | MH546600 | MH546601 | MH546602 | MH546603 | MH546604 | MH546605 | MH546606 | MH546607 |
| A/mallard/Minnesota/15-037267-1/2015(H1N1)     | Wild birds | MH546616 | MH546617 | MH546618 | MH546619 | MH546620 | MH546621 | MH546622 | MH546623 |
| A/mallard/Minnesota/15-040386-1/2015(H5N9)     | Wild birds | MH546624 | MH546625 | MH546626 | MH546627 | MH546628 | MH546629 | MH546630 | MH546631 |
| A/mallard/Minnesota/15-040386-2/2015(H1N1)     | Wild birds | MH546632 | MH546633 | MH546634 | MH546635 | MH546636 | MH546637 | MH546638 | MH546639 |
| A/mallard/Minnesota/15-041504-5/2015(H5N2)     | Wild birds | MH546640 | MH546641 | MH546642 | MH546643 | MH546644 | MH546645 | MH546646 | MH546647 |
| A/mallard/Minnesota/16-039026-1/2016(H5N2)     | Wild birds | MH546648 | MH546649 | MH546650 | MH546651 | MH546652 | MH546653 | MH546654 | MH546655 |
| A/mallard/Minnesota/16-041335-3/2016(H5N2)     | Wild birds | MH546656 | MH546657 | MH546658 | MH546659 | MH546660 | MH546661 | MH546662 | MH546663 |
| A/mallard/Minnesota/16-041335-4/2016(H5N5)     | Wild birds | MH546664 | MH546665 | MH546666 | MH546667 | MH546668 | MH546669 | MH546670 | MH546671 |
| A/mallard/Nevada/16-035274-2/2016(H5N2)        | Wild birds | MH546672 | MH546673 | MH546674 | MH546675 | MH546676 | MH546677 | MH546678 | MH546679 |
| A/mallard/NewHampshire/16-029391-25/2016(H5N3) | Wild birds | MH546680 | MH546681 | MH546682 | MH546683 | MH546684 | MH546685 | MH546686 | MH546687 |
| A/mallard/NewJersey/16-000670-2/2015(H6N1)     | Wild birds | MH546688 | MH546689 | MH546690 | MH546691 | MH546692 | MH546693 | MH546694 | MH546695 |
| A/mallard/NorthDakota/16-036222-1/2016(H5N1)   | Wild birds | MH546696 | MH546697 | MH546698 | MH546699 | MH546700 | MH546701 | MH546702 | MH546703 |
| A/mallard/Oregon/15-036812-2/2015(H5N2)        | Wild birds | MH546704 | MH546705 | MH546706 | MH546707 | MH546708 | MH546709 | MH546710 | MH546711 |
| A/mallard/Oregon/16-028808-2/2016(H5N2)        | Wild birds | MH546712 | MH546713 | MH546714 | MH546715 | MH546716 | MH546717 | MH546718 | MH546719 |
| A/mallard/Oregon/17-000383-4/2016(H5N2)        | Wild birds | MH546720 | MH546721 | MH546722 | MH546723 | MH546724 | MH546725 | MH546726 | MH546727 |
| A/mallard/Pennsylvania/16-035727-1/2016(H5N6)  | Wild birds | MH546728 | MH546729 | MH546730 | MH546731 | MH546732 | MH546733 | MH546734 | MH546735 |
| A/mallard/SouthDakota/16-001430-2/2016(H7N1)   | Wild birds | MH546736 | MH546737 | MH546738 | MH546739 | MH546740 | MH546741 | MH546742 | MH546743 |
| A/mallard/Tennessee/AH0039713/2016(H7N1)       | Wild birds | KY550909 | KY550910 | KY550911 | KY550912 | KY550913 | KY550914 | KY550915 | KY550916 |
| A/mallard/Utah/15-037258-1/2015(H1N1)          | Wild birds | MH546744 | MH546745 | MH546746 | MH546747 | MH546748 | MH546749 | MH546750 | MH546751 |
| A/mallard/Utah/16-025311-2/2016(H5N9)          | Wild birds | MH546752 | MH546753 | MH546754 | MH546755 | MH546756 | MH546757 | MH546758 | MH546759 |
| A/mallard/Washington/16-027073-21/2016(H5N2)   | Wild birds | MH546760 | MH546761 | MH546762 | MH546763 | MH546764 | MH546765 | MH546766 | MH546767 |
| A/mallard/Washington/16-027073-22/2016(H5N2)   | Wild birds | MH546768 | MH546769 | MH546770 | MH546771 | MH546772 | MH546773 | MH546774 | MH546775 |
| A/mallard/Washington/16-027073-45/2016(H5N2)   | Wild birds | MH546776 | MH546777 | MH546778 | MH546779 | MH546780 | MH546781 | MH546782 | MH546783 |
| A/mallard/Washington/16-027073-46/2016(H5N2)   | Wild birds | MH546784 | MH546785 | MH546786 | MH546787 | MH546788 | MH546789 | MH546790 | MH546791 |
| A/mallard/Washington/16-027073-48/2016(H5N2)   | Wild birds | MH546792 | MH546793 | MH546794 | MH546795 | MH546796 | MH546797 | MH546798 | MH546799 |
| A/mallard/Washington/16-027073-5/2016(H5N2)    | Wild birds | MH546800 | MH546801 | MH546802 | MH546803 | MH546804 | MH546805 | MH546806 | MH546807 |
| A/mallard/Washington/16-028147-4/2016(H5N2)    | Wild birds | MH546808 | MH546809 | MH546810 | MH546811 | MH546812 | MH546813 | MH546814 | MH546815 |
| A/Muscovyduck/NewJersey/16-002384-6/2016(H1N1) | Wild birds | MH546264 | MH546265 | MH546266 | MH546267 | MH546268 | MH546269 | MH546270 | MH546271 |



|                                                       |            |          |          |          |          |          |          |          |          |
|-------------------------------------------------------|------------|----------|----------|----------|----------|----------|----------|----------|----------|
| A/Muscovyduck/Pennsylvania/16-003000-1/2016(H1N1)     | Wild birds | MH546312 | MH546313 | MH546314 | MH546315 | MH546316 | MH546317 | MH546318 | MH546319 |
| A/Northern Pintail Duck/Alaska/UGA115-6978/2015(H6N1) | Wild birds | KY131302 | KY131303 | KY131304 | KY131305 | KY131306 | KY131307 | KY131308 | KY131309 |
| A/Northern Pintail Duck/Alaska/UGA115-6985/2015(H6N1) | Wild birds | KY131310 | KY131311 | KY131312 | KY131313 | KY131314 | KY131315 | KY131316 | KY131317 |
| A/Northern Pintail Duck/Alaska/UGA115-6993/2015(H6N1) | Wild birds | KY131318 | KY131319 | KY131320 | KY131321 | KY131322 | KY131323 | KY131324 | KY131325 |
| A/Northern Pintail Duck/Alaska/UGA115-6994/2015(H6N1) | Wild birds | KY131326 | KY131327 | KY131328 | KY131329 | KY131330 | KY131331 | KY131332 | KY131333 |
| A/northern pintail/Alaska/UGA115-7300/2015(H6N1)      | Wild birds | KY131357 | KY131358 | KY131359 | KY131360 | KY131361 | KY131362 | KY131363 | KY131364 |
| A/northernpintail/Alaska/16-041335-10/2016(H5N2)      | Wild birds | MH546816 | MH546817 | MH546818 | MH546819 | MH546820 | MH546821 | MH546822 | MH546823 |
| A/northernpintail/Alaska/16-041335-11/2016(H5N2)      | Wild birds | MH546824 | MH546825 | MH546826 | MH546827 | MH546828 | MH546829 | MH546830 | MH546831 |
| A/northernpintail/Alaska/16-041335-12/2016(H5N2)      | Wild birds | MH546832 | MH546833 | MH546834 | MH546835 | MH546836 | MH546837 | MH546838 | MH546839 |
| A/northernpintail/Alaska/16-041335-13/2016(H5N2)      | Wild birds | MH546840 | MH546841 | MH546842 | MH546843 | MH546844 | MH546845 | MH546846 | MH546847 |
| A/northernpintail/Alaska/16-041335-15/2016(H5N2)      | Wild birds | MH546848 | MH546849 | MH546850 | MH546851 | MH546852 | MH546853 | MH546854 | MH546855 |
| A/northernpintail/Alaska/16-041335-16/2016(H5N2)      | Wild birds | MH546856 | MH546857 | MH546858 | MH546859 | MH546860 | MH546861 | MH546862 | MH546863 |
| A/northernpintail/Alaska/16-041335-17/2016(H5N2)      | Wild birds | MH546864 | MH546865 | MH546866 | MH546867 | MH546868 | MH546869 | MH546870 | MH546871 |
| A/northernpintail/Alaska/16-041335-18/2016(H5N2)      | Wild birds | MH546872 | MH546873 | MH546874 | MH546875 | MH546876 | MH546877 | MH546878 | MH546879 |
| A/northernpintail/Alaska/16-041335-5/2016(H5N2)       | Wild birds | MH546880 | MH546881 | MH546882 | MH546883 | MH546884 | MH546885 | MH546886 | MH546887 |
| A/northernpintail/Alaska/16-041335-6/2016(H5N2)       | Wild birds | MH546888 | MH546889 | MH546890 | MH546891 | MH546892 | MH546893 | MH546894 | MH546895 |
| A/northernpintail/Alaska/16-041335-7/2016(H5N2)       | Wild birds | MH546896 | MH546897 | MH546898 | MH546899 | MH546900 | MH546901 | MH546902 | MH546903 |
| A/northernpintail/Alaska/16-041335-8/2016(H5N2)       | Wild birds | MH546904 | MH546905 | MH546906 | MH546907 | MH546908 | MH546909 | MH546910 | MH546911 |
| A/northernpintail/Alaska/16-041335-9/2016(H5N2)       | Wild birds | MH546912 | MH546913 | MH546914 | MH546915 | MH546916 | MH546917 | MH546918 | MH546919 |
| A/northernshoveler/Alaska/17-004479-3/2016(H5N2)      | Wild birds | MH546920 | MH546921 | MH546922 | MH546923 | MH546924 | MH546925 | MH546926 | MH546927 |
| A/northernshoveler/California/15-039075-4/2015(H5N3)  | Wild birds | MH546928 | MH546929 | MH546930 | MH546931 | MH546932 | MH546933 | MH546934 | MH546935 |
| A/northernshoveler/Oregon/16-000283-1/2015(H5N3)      | Wild birds | MH546936 | MH546937 | MH546938 | MH546939 | MH546940 | MH546941 | MH546942 | MH546943 |
| A/ring-neckedduck/California/16-004032-1/2016(H5N2)   | Wild birds | MH546968 | MH546969 | MH546970 | MH546971 | MH546972 | MH546973 | MH546974 | MH546975 |
| A/Ruddy Turnstone /New Jersey/UGA114-1322/2014(H6N1)  | Wild birds | MH341747 | MH341748 | MH341749 | MH341750 | MH341751 | MH341752 | MH341753 | MH341754 |
| A/Ruddy Turnstone /New Jersey/UGA114-1399/2014(H6N1)  | Wild birds | MH341755 | MH341756 | MH341757 | MH341758 | MH341759 | MH341760 | MH341761 | MH341762 |
| A/Ruddy Turnstone /New Jersey/UGA114-1478/2014(H6N1)  | Wild birds | MH341763 | MH341764 | MH341765 | MH341766 | MH341767 | MH341768 | MH341769 | MH341770 |
| A/Ruddy Turnstone /New Jersey/UGA114-1857/2014(H12N1) | Wild birds | MH341771 | MH341772 | MH341773 | MH341774 | MH341775 | MH341776 | MH341777 | MH341778 |
| A/RUDDY TURNSTONE/DE/117/2011 (H5N9)                  | Wild birds | MF359831 | MF359874 | MF359821 | MF359846 | MF359878 | MF359884 | MF359834 | MF359867 |
| A/RUDDY TURNSTONE/DE/431/2011 (H5N2)                  | Wild birds | MF359885 | MF359847 | MF359881 | MF359838 | MF359850 | MF359839 | MF359849 | MF359880 |
| A/ruddy turnstone/Delaware Bay/317/2016(Mixed)        | Wild birds | MF613762 | MF613881 | MF613924 | MF613724 | MF046298 | MF613766 | MF613731 | MF046472 |
| A/Ruddy Turnstone/New Jersey/UGA115-3003/2015(H1N1)   | Wild birds | MH341779 | MH341780 | MH341781 | MH341782 | MH341783 | MH341784 | MH341785 | MH341786 |

|                                                     |            |          |          |          |          |          |          |          |          |
|-----------------------------------------------------|------------|----------|----------|----------|----------|----------|----------|----------|----------|
| A/Ruddy Turnstone/New Jersey/UGAI15-3172/2015(H7N1) | Wild birds | MH341787 | MH341788 | MH341789 | MH341790 | MH341791 | MH341792 | MH341793 | MH341794 |
| A/Ruddy Turnstone/New Jersey/UGAI15-3256/2015(H1N1) | Wild birds | MH341795 | MH341796 | MH341797 | MH341798 | MH341799 | MH341800 | MH341801 | MH341802 |
| A/Ruddy Turnstone/New Jersey/UGAI15-3295/2015(H1N1) | Wild birds | MH341803 | MH341804 | MH341805 | MH341806 | MH341807 | MH341808 | MH341809 | MH341810 |
| A/Ruddy Turnstone/New Jersey/UGAI15-3685/2015(H7N1) | Wild birds | MH341811 | MH341812 | MH341813 | MH341814 | MH341815 | MH341816 | MH341817 | MH341818 |
| A/Ruddy Turnstone/New Jersey/UGAI15-3980/2015(H7N1) | Wild birds | MH341819 | MH341820 | MH341821 | MH341822 | MH341823 | MH341824 | MH341825 | MH341826 |
| A/Ruddy Turnstone/New Jersey/UGAI15-4065/2015(H1N1) | Wild birds | MH341827 | MH341828 | MH341829 | MH341830 | MH341831 | MH341832 | MH341833 | MH341834 |
| A/Ruddy Turnstone/New Jersey/UGAI15-4243/2015(H1N1) | Wild birds | MH341835 | MH341836 | MH341837 | MH341838 | MH341839 | MH341840 | MH341841 | MH341842 |
| A/SHOREBIRD/DE/318/2011 (H5N2)                      | Wild birds | MF359844 | MF359827 | MF359863 | MF359824 | MF359830 | MF359845 | MF359858 | MF359886 |
| A/spot-billed duck/Alberta/264/2016(H1N1)           | Wild birds | MF046570 | MF046514 | MF046351 | MF046306 | MF046504 | MF046403 | MF046536 | MF046468 |
| A/swan/Wyoming/16-026450-2/2016(H1N1)               | Wild birds | MH546976 | MH546977 | MH546978 | MH546979 | MH546980 | MH546981 | MH546982 | MH546983 |

<sup>a</sup>Commercial poultry farms (CPFs), backyard poultry (BYPs), game bird poultry (GBPs,) and in live bird markets (LBMs); n/a, not available.

**Table S6.** Number of genomic sequences of avian influenza A viruses included in data analyses, which were downloaded from public databases.

| <b>Segment</b> | <b>World Wide</b> | <b>North America</b> |
|----------------|-------------------|----------------------|
| PB2            | 19292             | 8844                 |
| PB1            | 19370             | 8971                 |
| PA             | 19232             | 8932                 |
| HA             | 29210             | 9395                 |
| NP             | 19129             | 8666                 |
| NA             | 22290             | 8883                 |
| MP             | 20288             | 9140                 |
| NS             | 19677             | 8890                 |
